# Supplementary material for: Azetidine- and N-carboxylic azetidine-iminosugars as amyloglucosidase inhibitors: synthesis, glycosidase inhibitory activity and molecular docking studies
Source: Royal Society of Chemistry journal article supplement (doi:10.1039/c5ob00668f), 2015-01-01

## Supporting Information

### **Azetidine and *N*-Carboxylic Azetidine Iminosugars as Amyloglucosidase Inhibitors: Synthesis, Glycosidase Inhibitory Activity and Molecular Docking Studies.**

Kishor S. Gavale,<sup>a</sup> Shrawan R. Chavan,<sup>a</sup> Ayesha Khan,<sup>a</sup> Rakesh Joshi,<sup>b</sup> Dilip D. Dhavale\*<sup>a</sup>

<sup>a</sup> Department of Chemistry, Garware Research Centre, Savitribai Phule Pune University (formerly University of Pune), Pune, 411 007, India

<sup>b</sup> Institute of Bioinformatics and Biotechnology, Savitribai Phule Pune University, Pune 411007, India

#### **Contents**

- 1) <sup>1</sup>H and <sup>13</sup>C spectra of compounds **4-22** and **2a-2f**, Pages 2-26
- 2) General Procedure for glycosidase inhibition assay and Lineweaver-Burk Plots of compounds **2a-2f**, Pages 27-30

Note:

The <sup>1</sup>H and <sup>13</sup>C NMR spectra of compounds **12**, **13**, **14** and **15** shows doubling of the signals due to presence of *N*-Cbz group.

**1,2;5,6-Di-*O*-isopropylidene-3-*C*-(dichloromethyl)- $\alpha$ -D-allofuranose (4)**

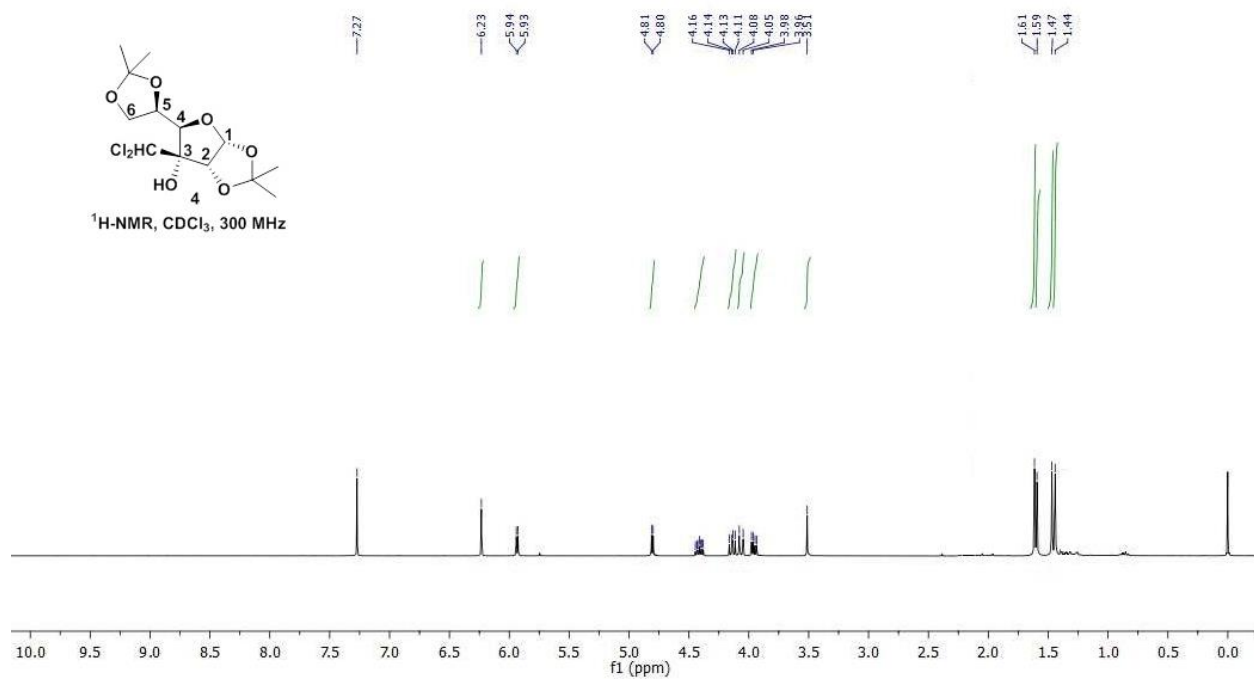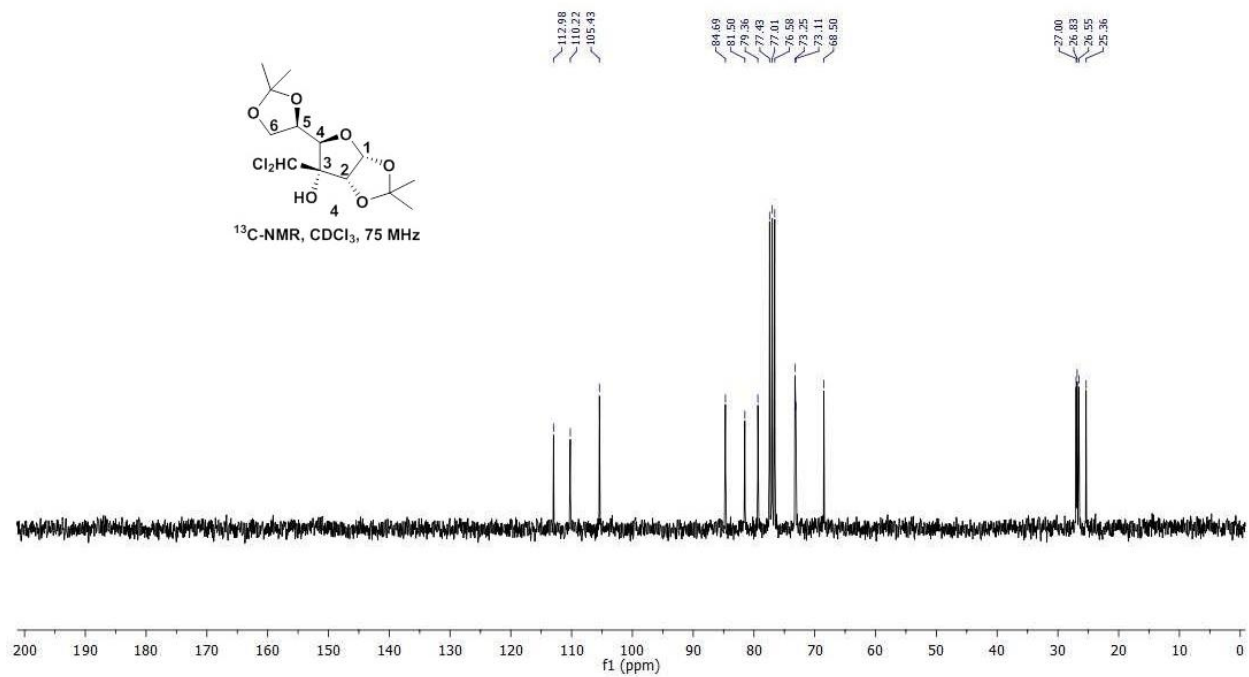

3-Azido-3-deoxy-3-C-(formyl)-1,2;5,6-di-*O*-isopropylidene- $\alpha$ -D-glucofuranose  
(5)

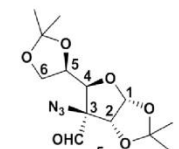

$^1\text{H-NMR}$ ,  $\text{CDCl}_3$ , 300 MHz

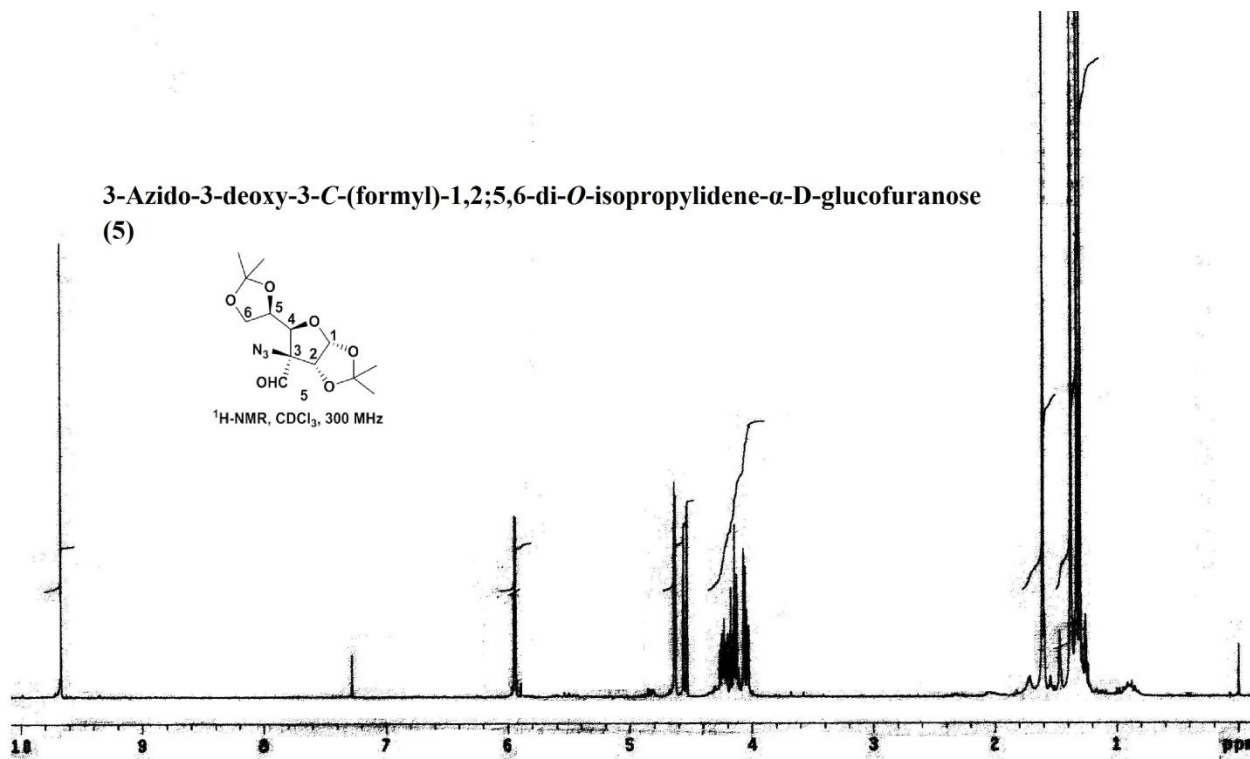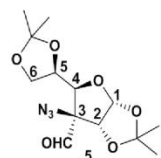

$^{13}\text{C-NMR}$ ,  $\text{CDCl}_3$ , 75 MHz

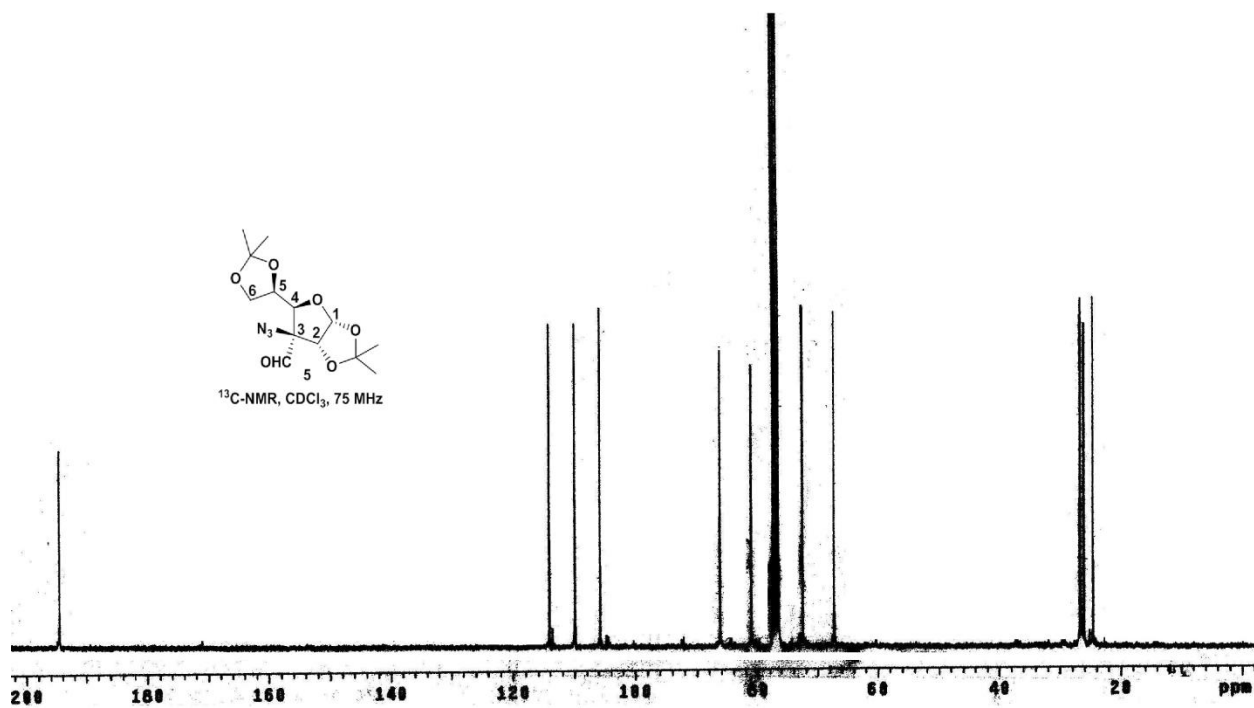

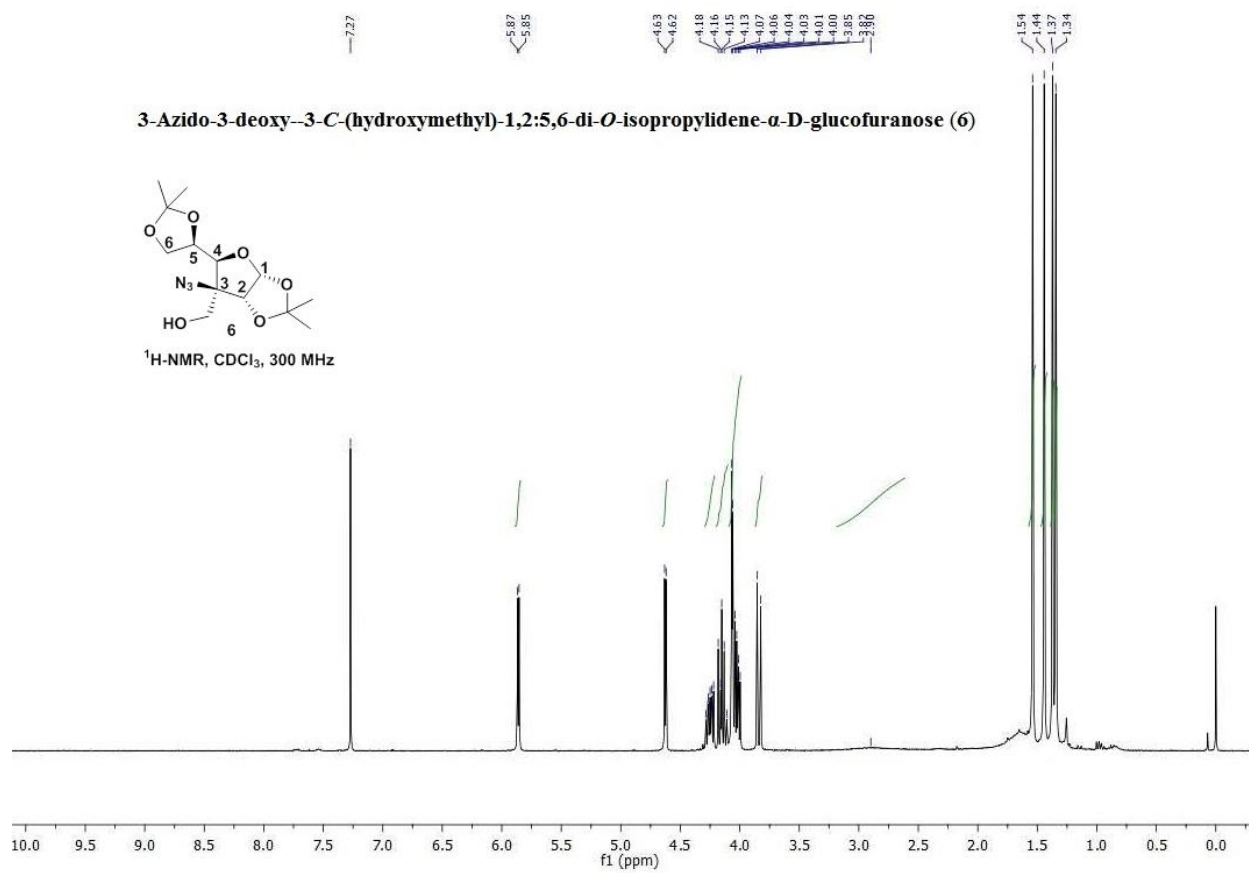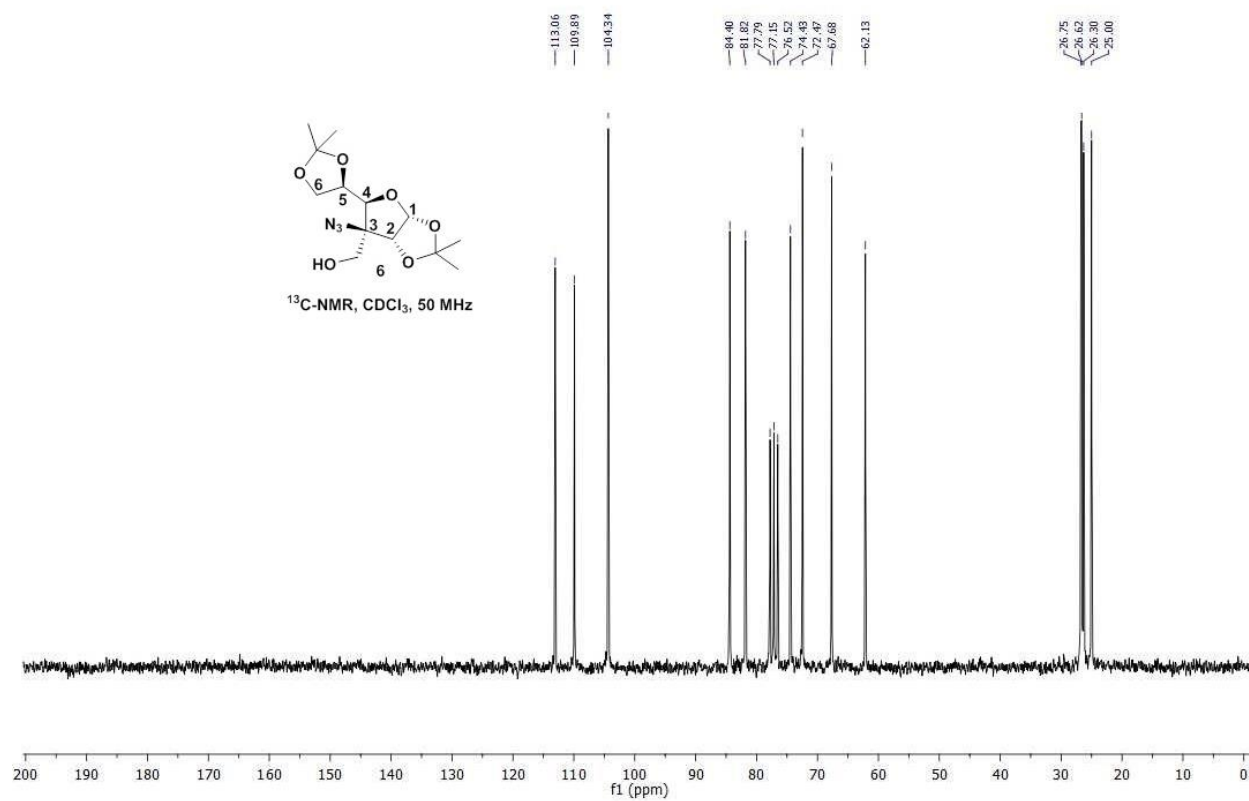

3-Azido-3-deoxy-3-*C*-(benzyloxymethyl)-1,2:5,6-di-*O*-isopropylidene- $\alpha$ -D-glucofuranose (7)

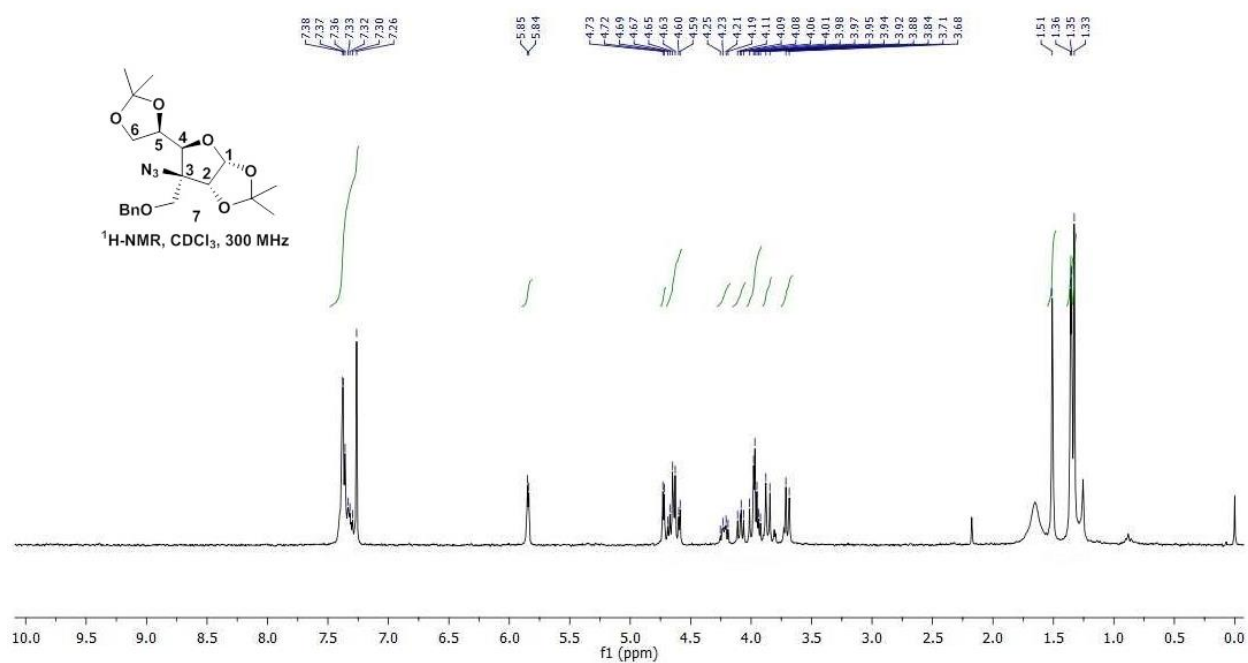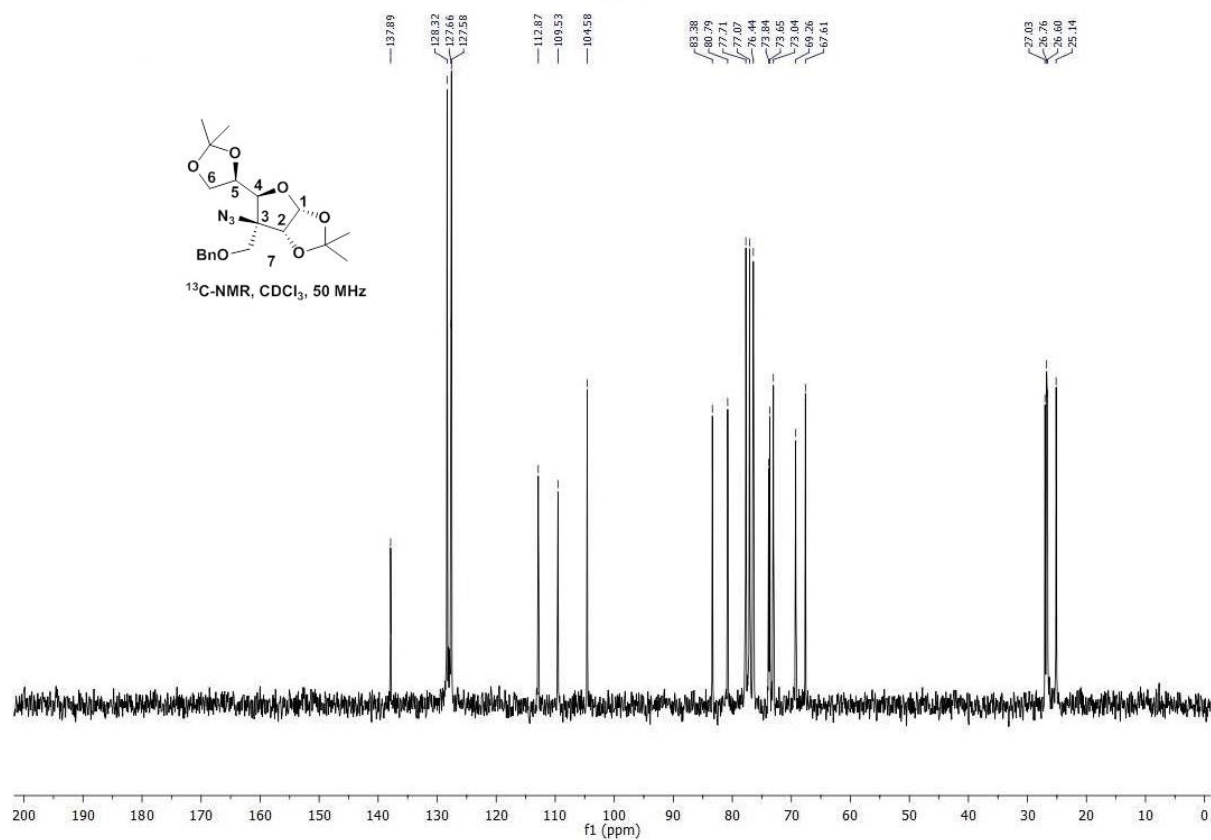

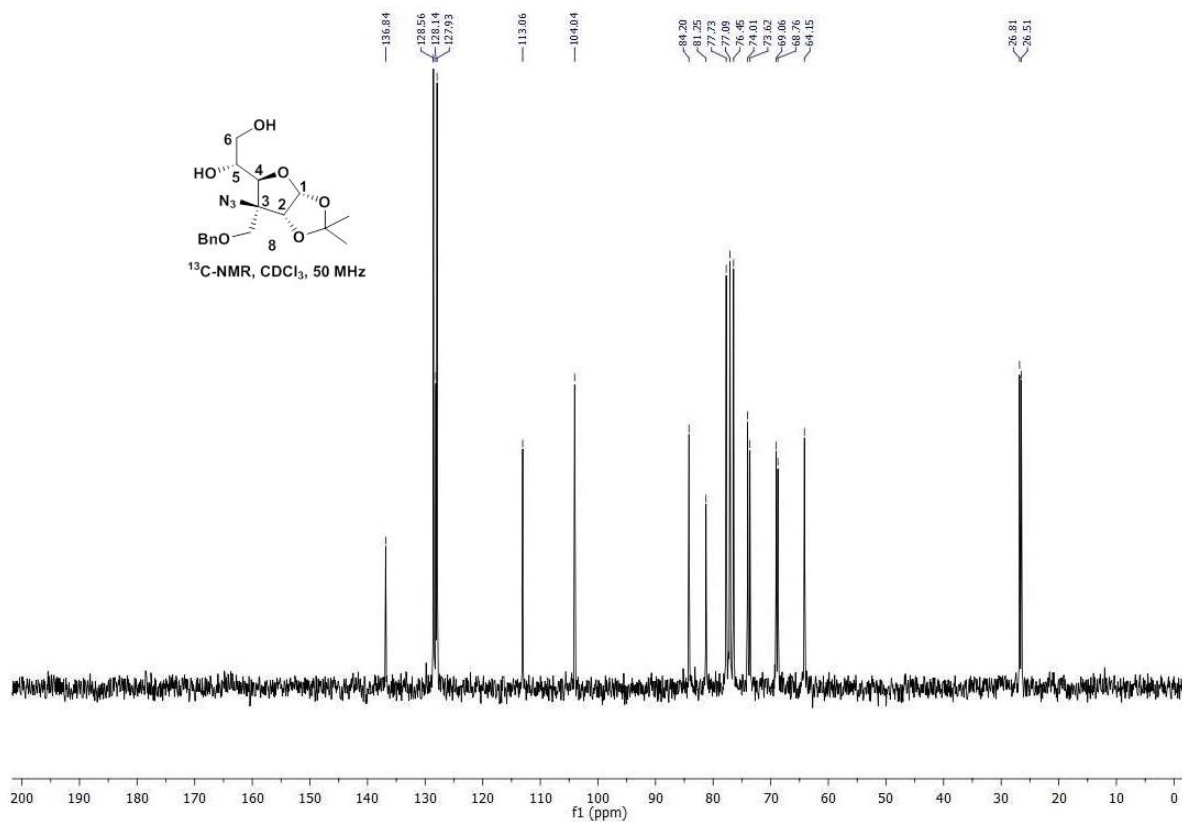

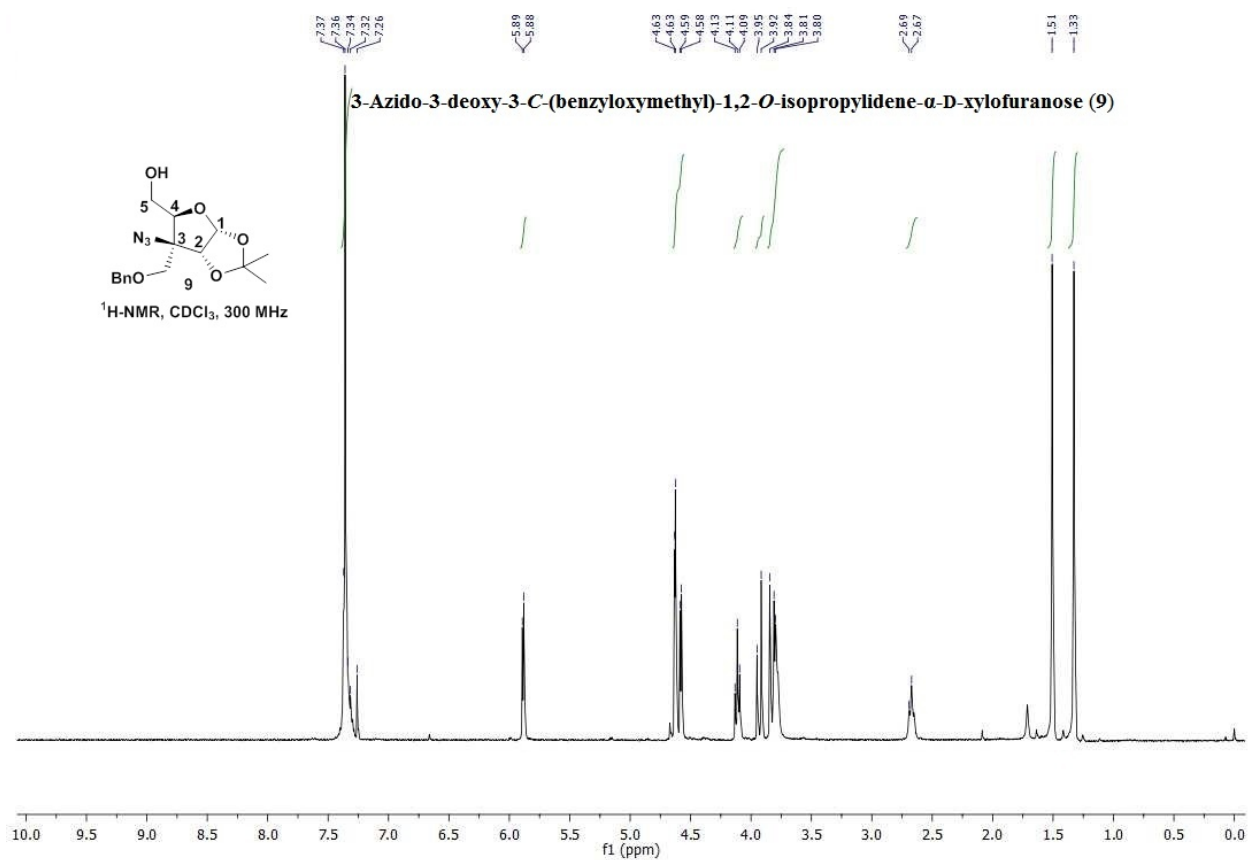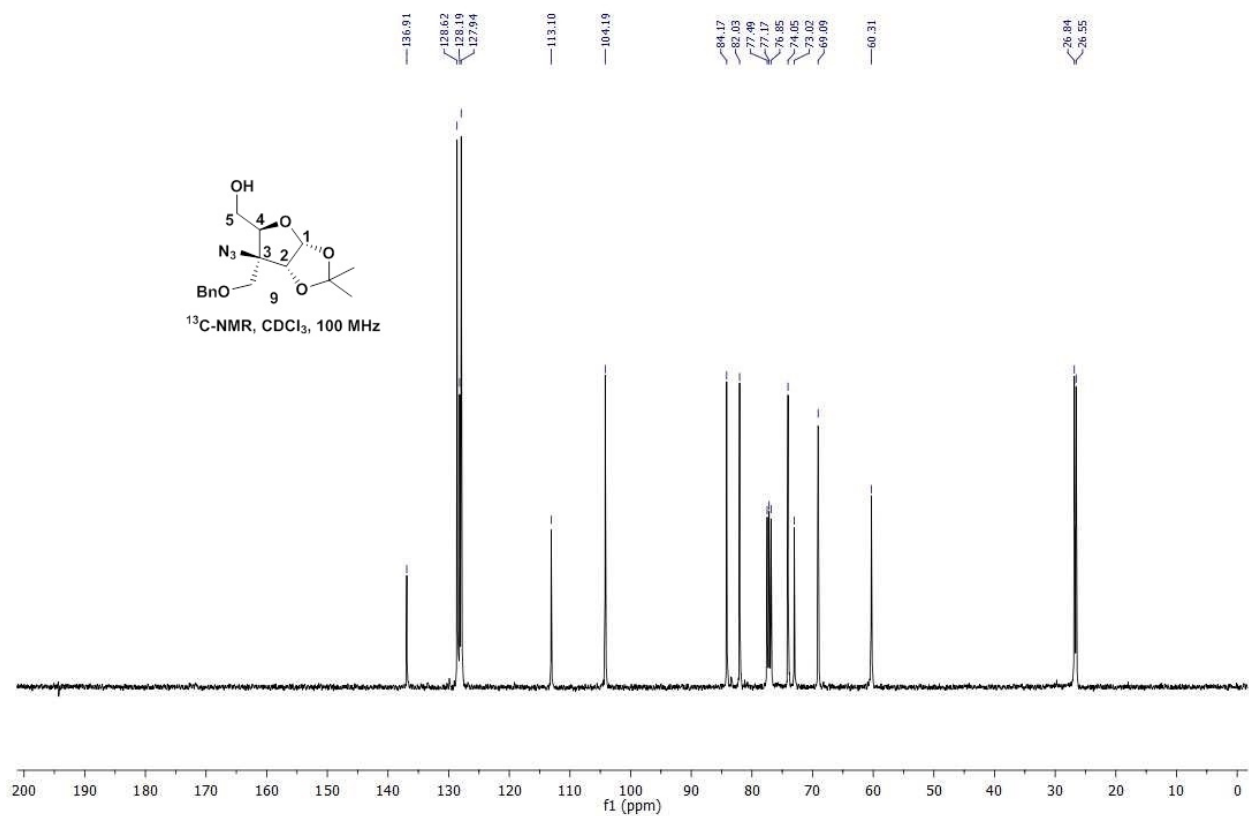

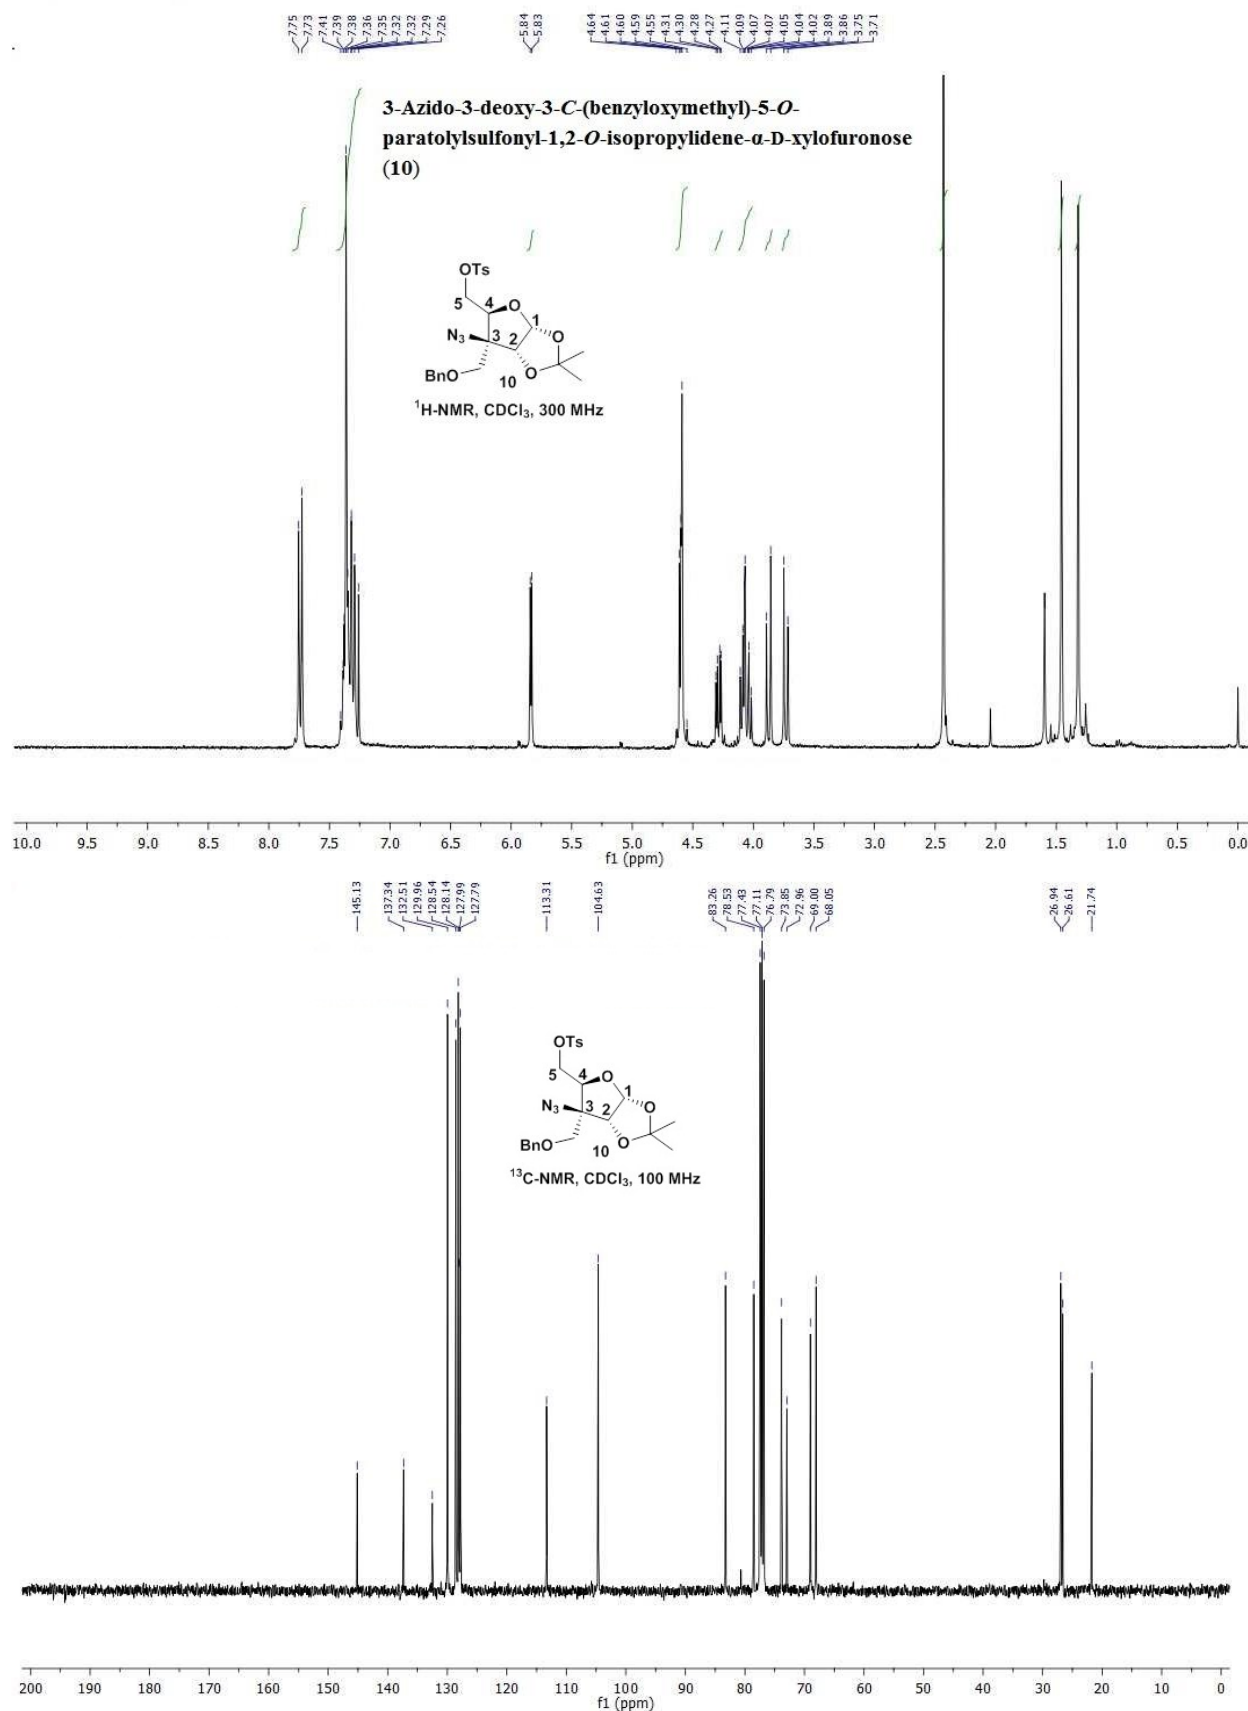



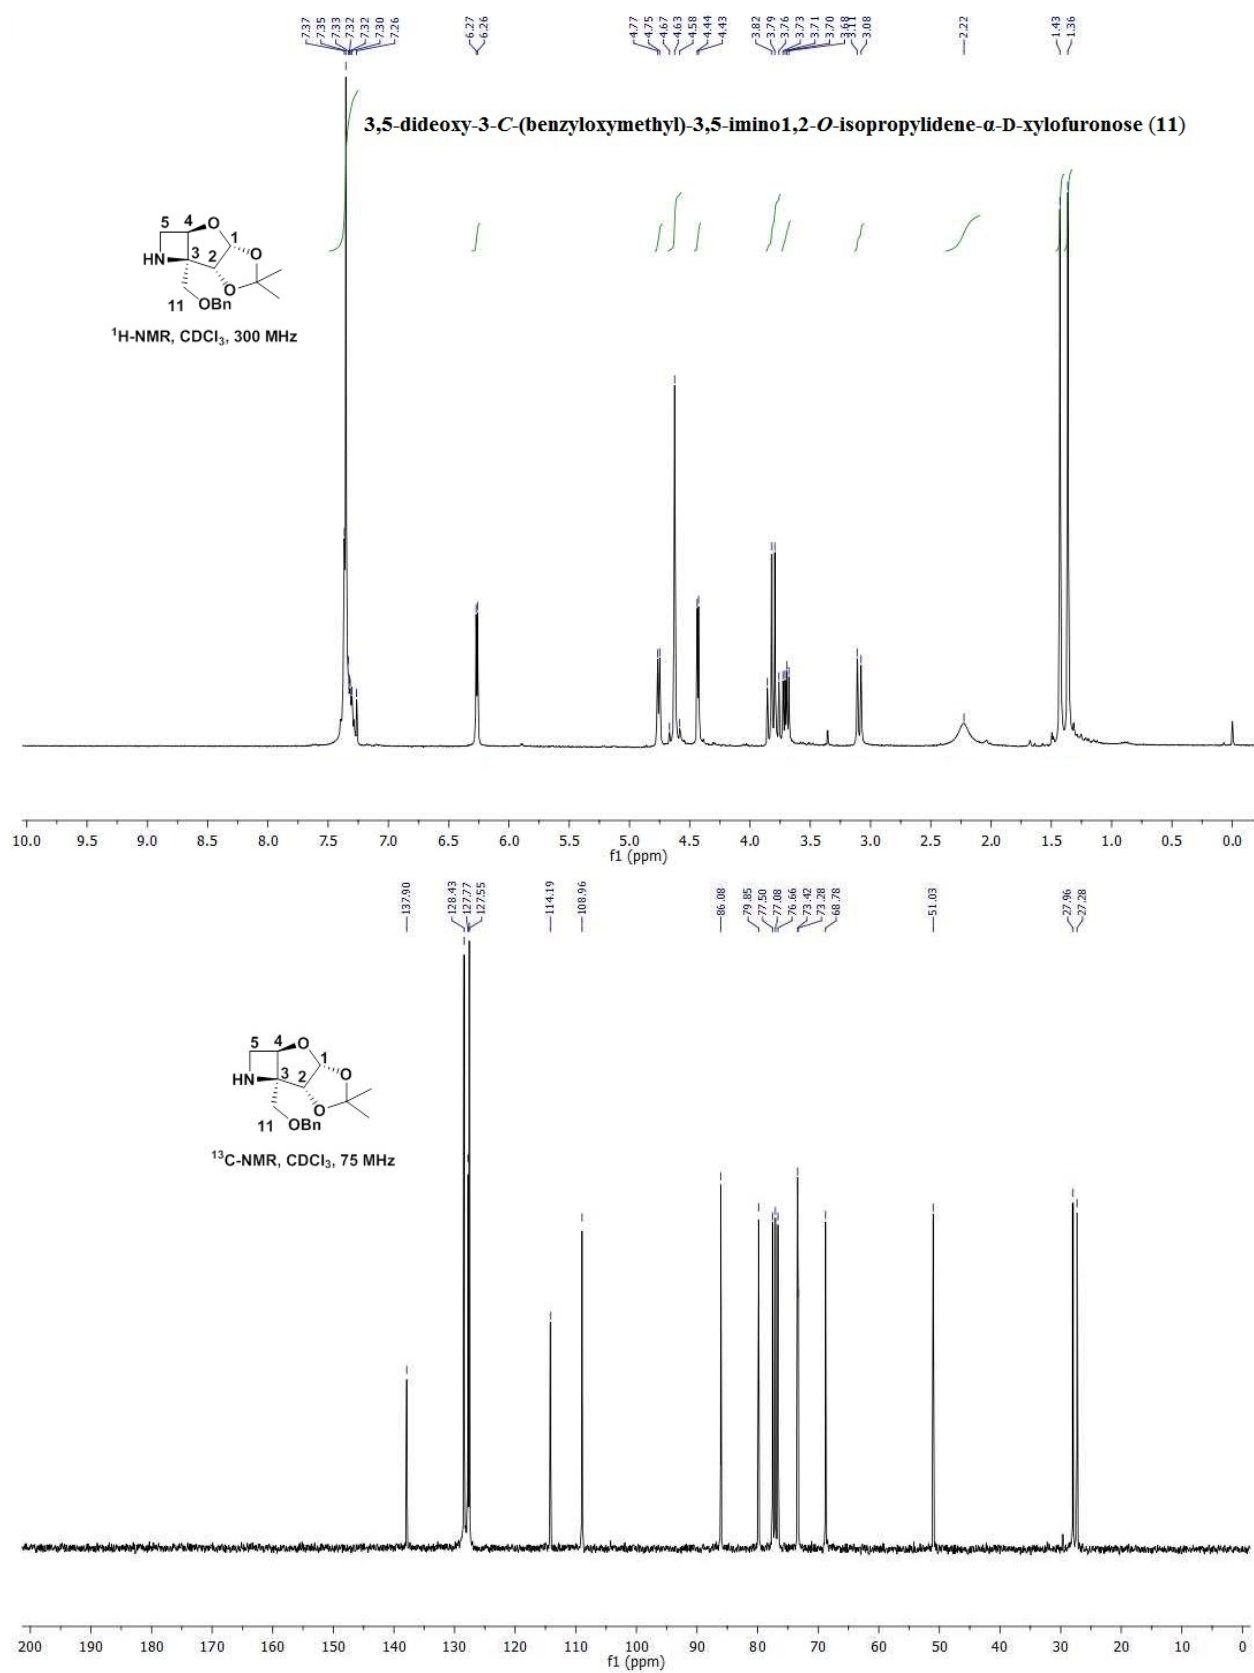

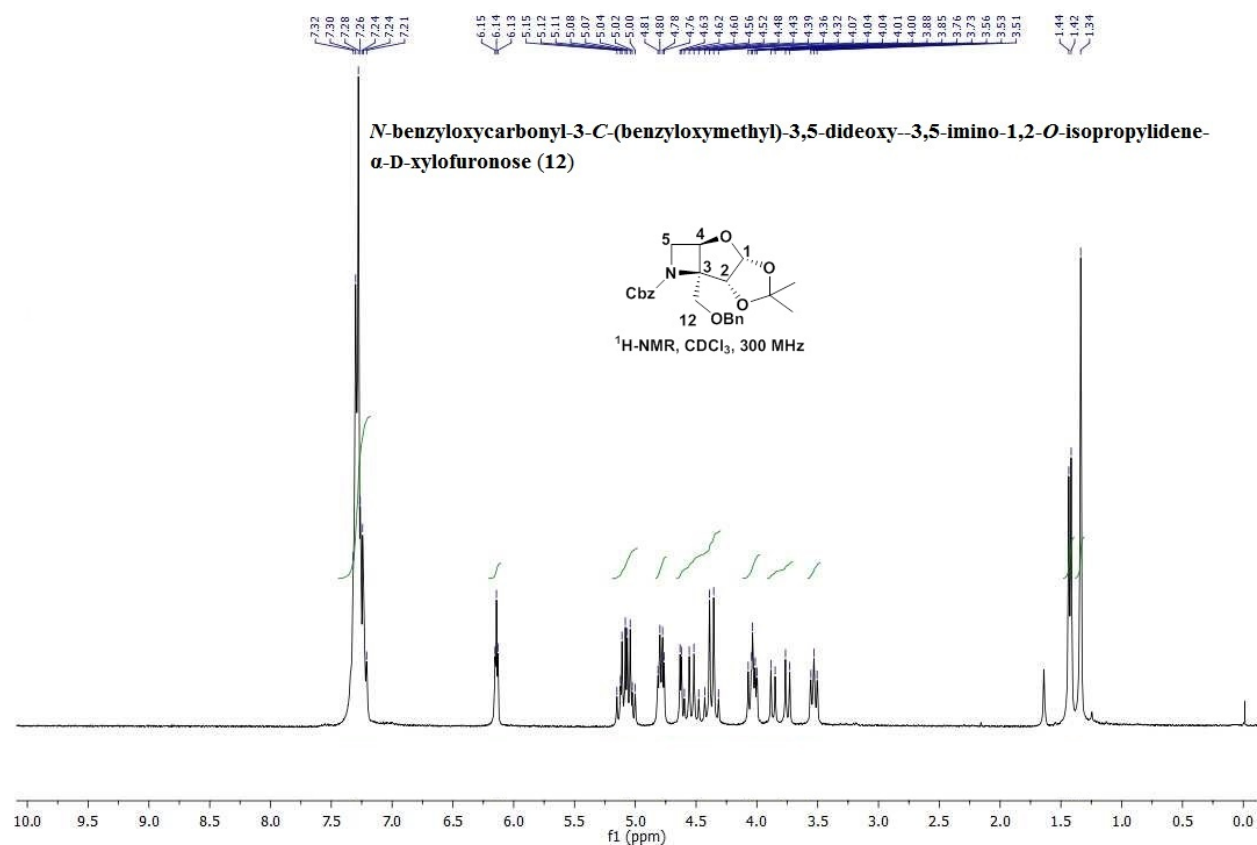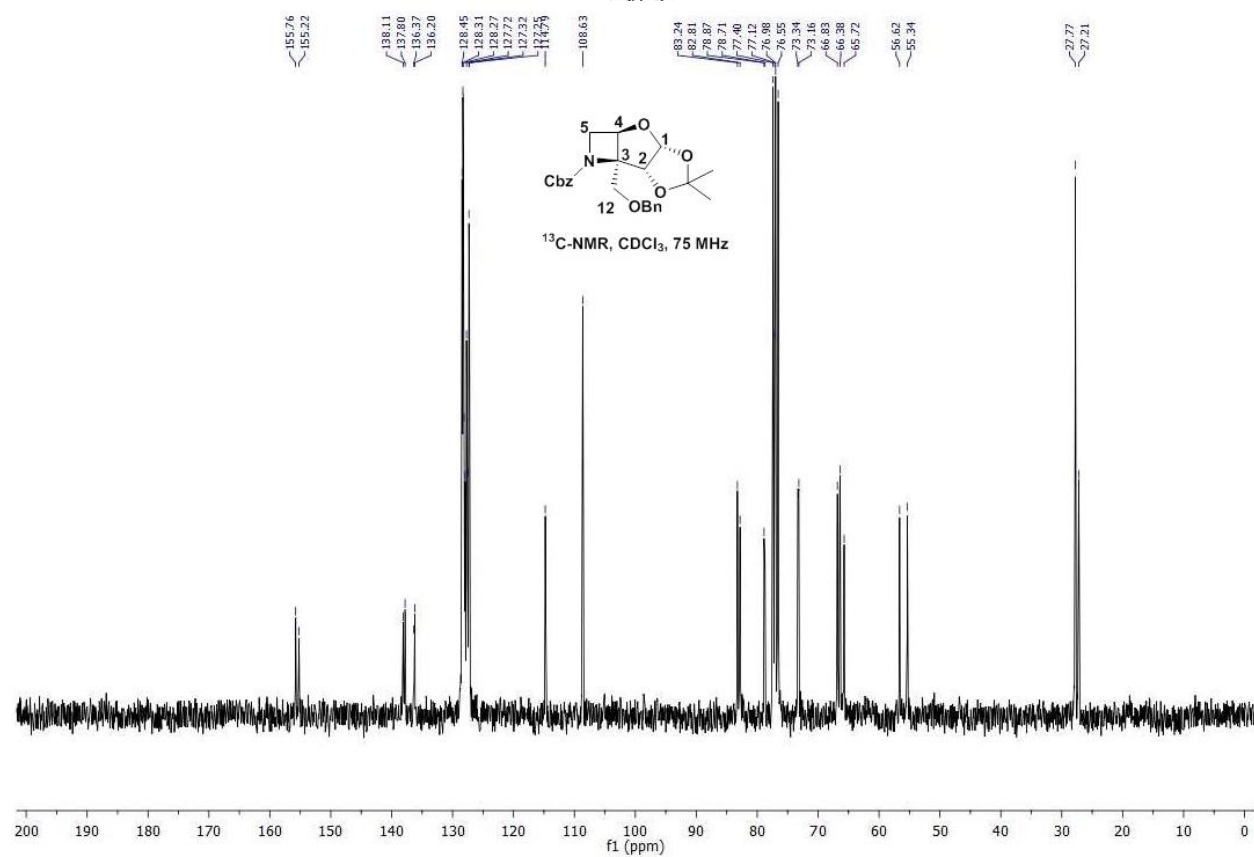

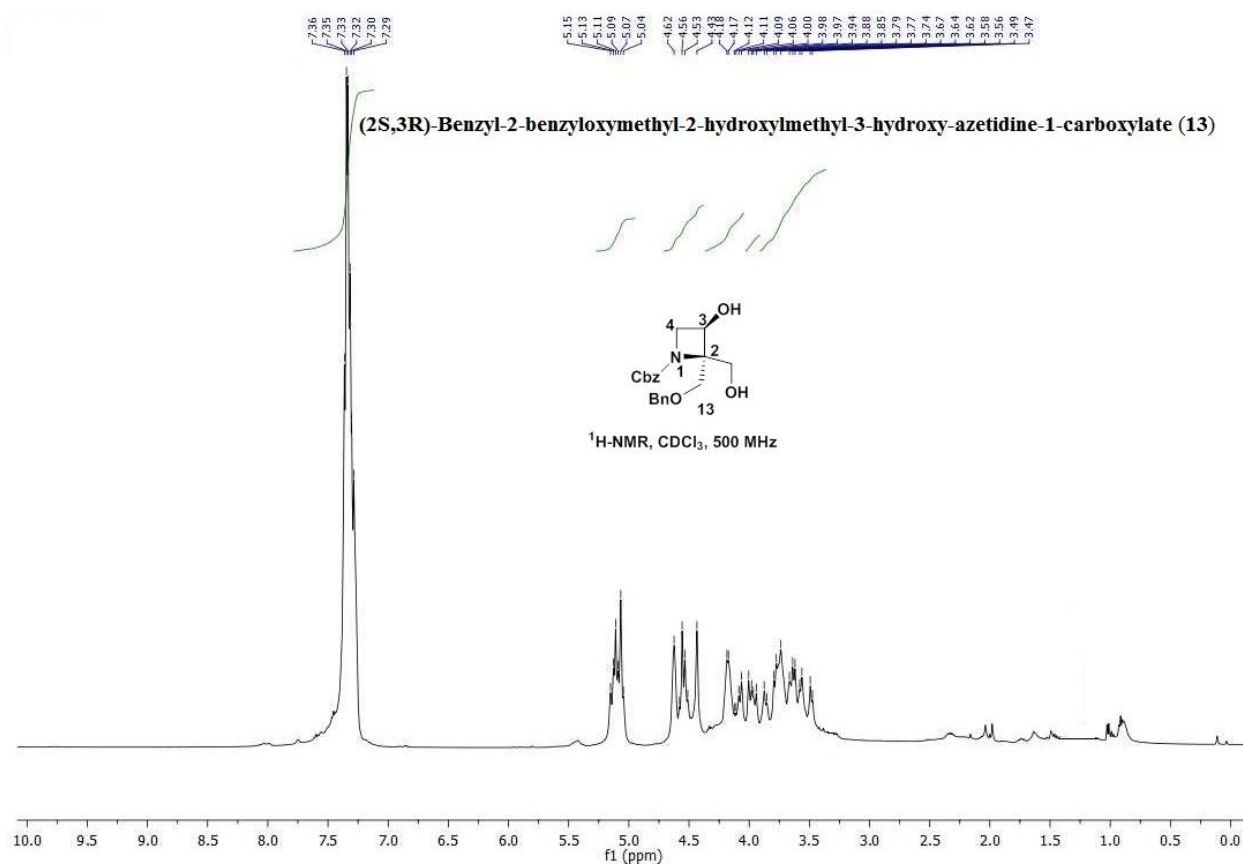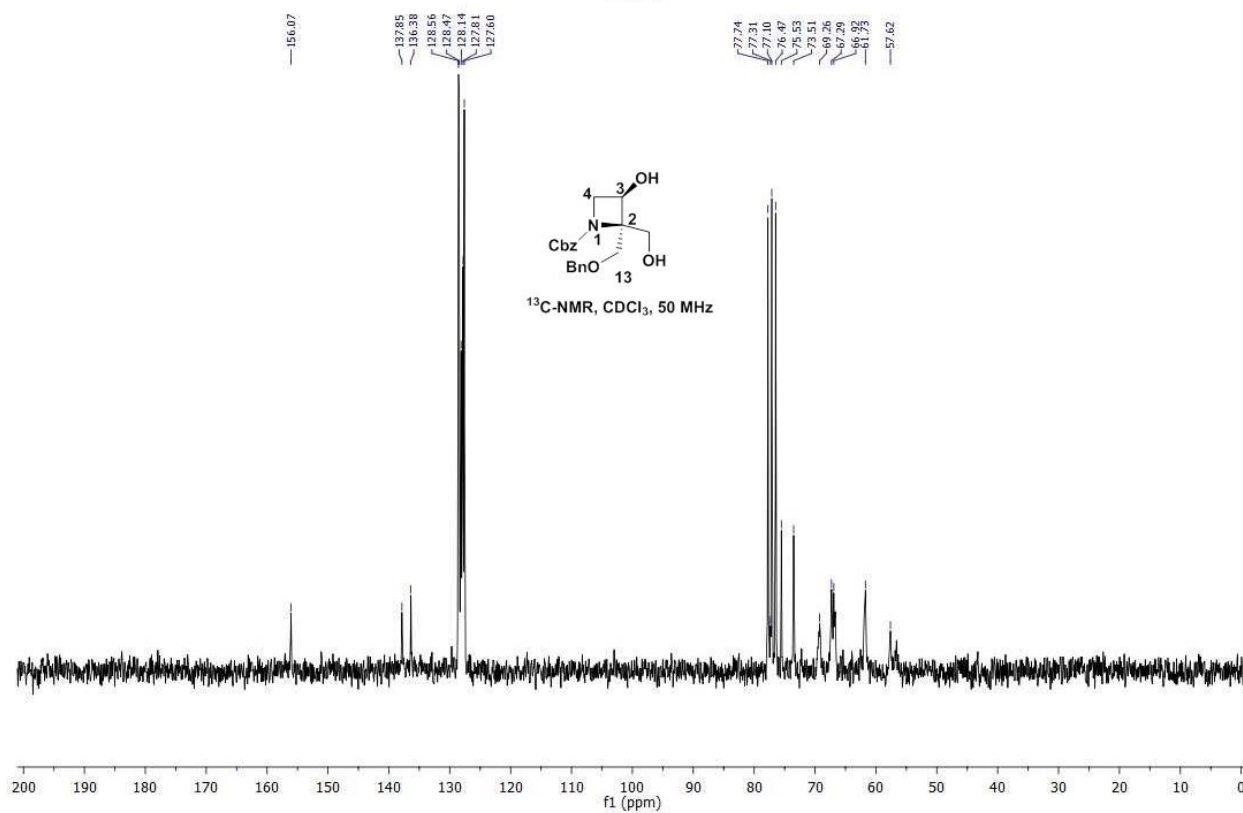

(3R)-2,2-Bis(hydroxymethyl)-azetidin-3-ol (2a)

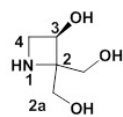

<sup>1</sup>H-NMR, D<sub>2</sub>O, 400 MHz

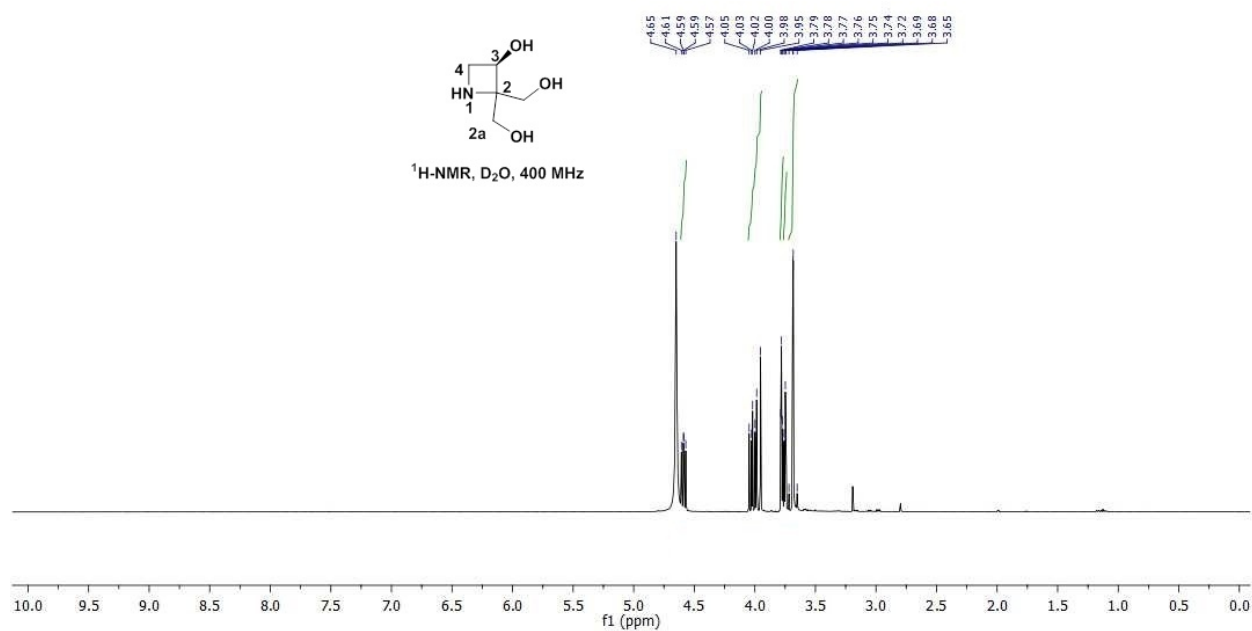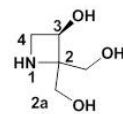

<sup>13</sup>C-NMR, D<sub>2</sub>O, 100 MHz

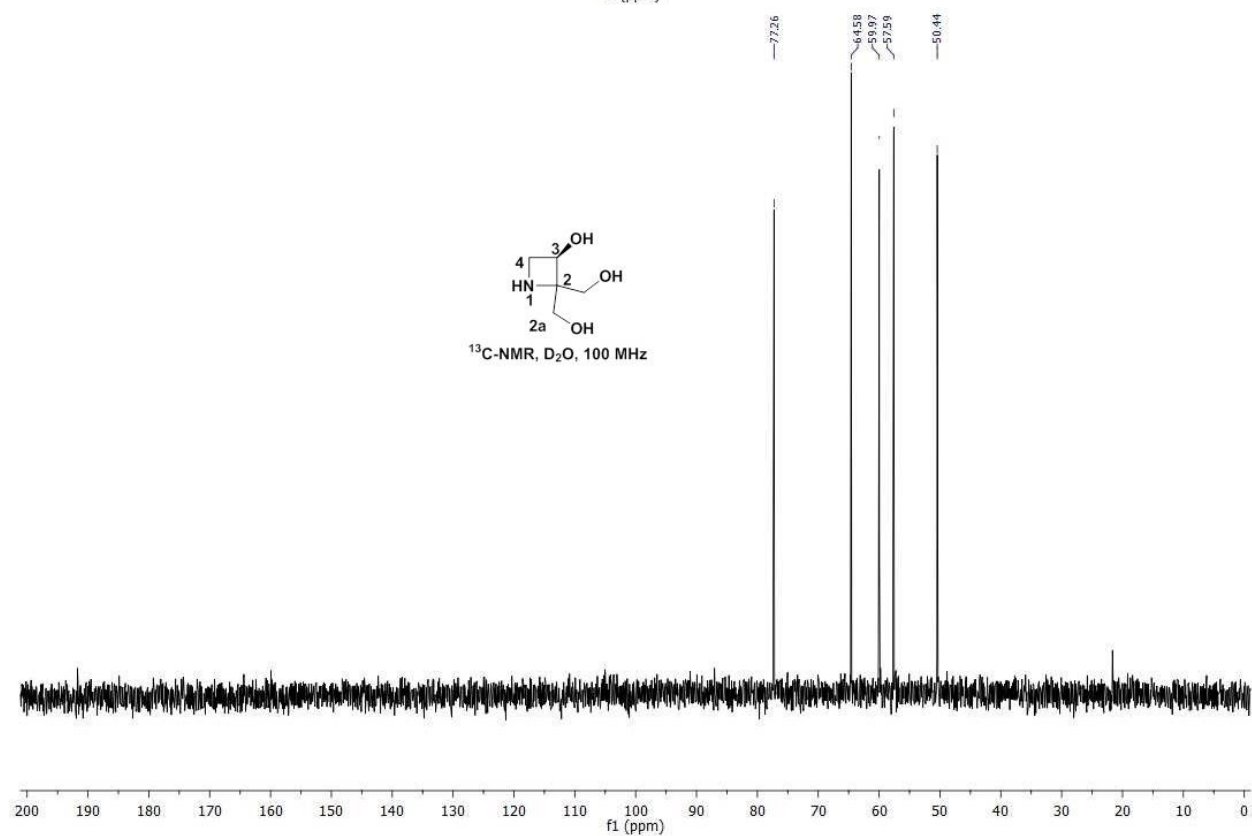

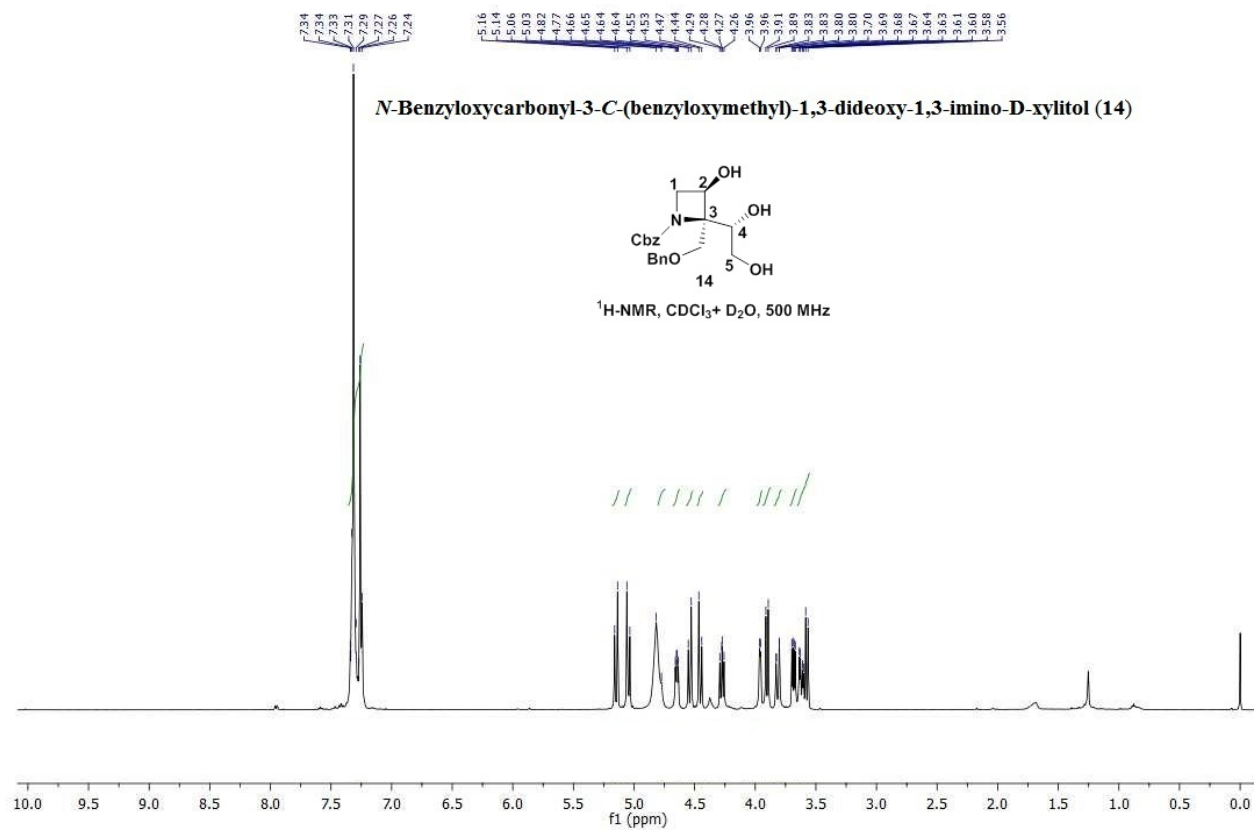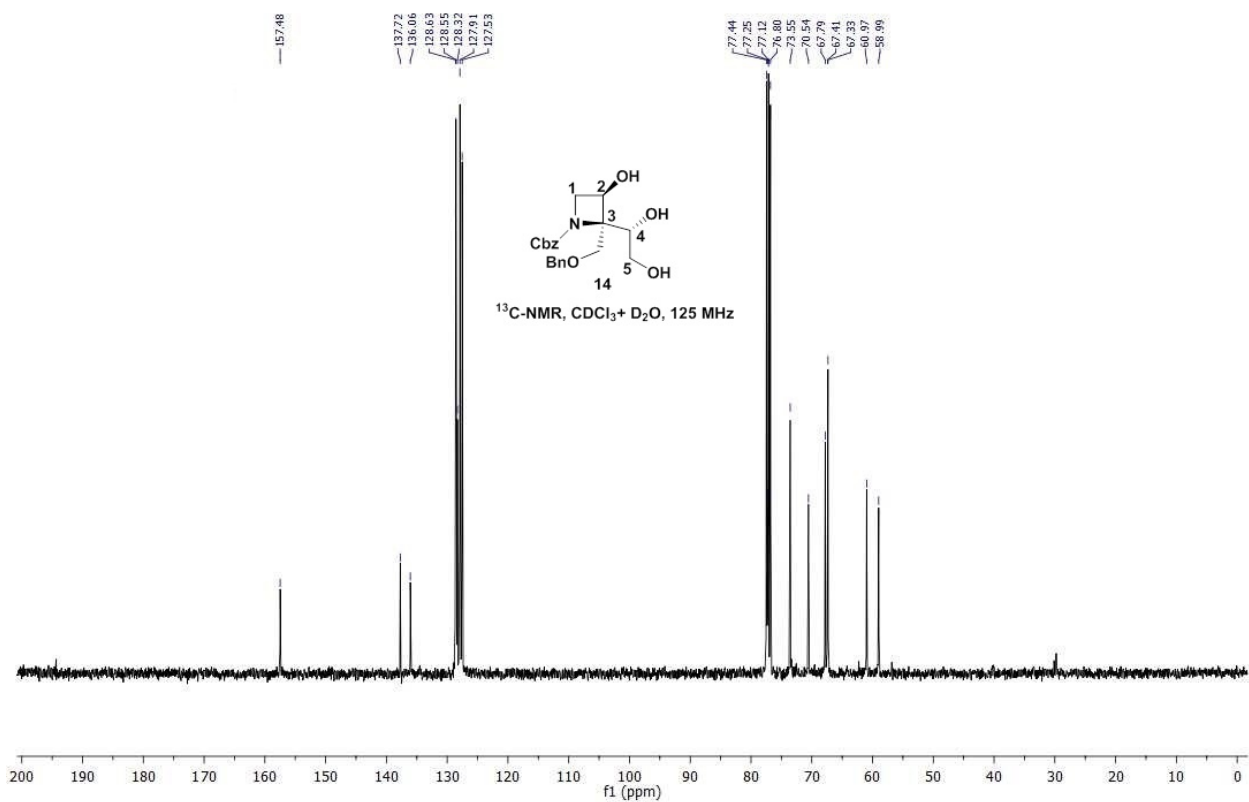

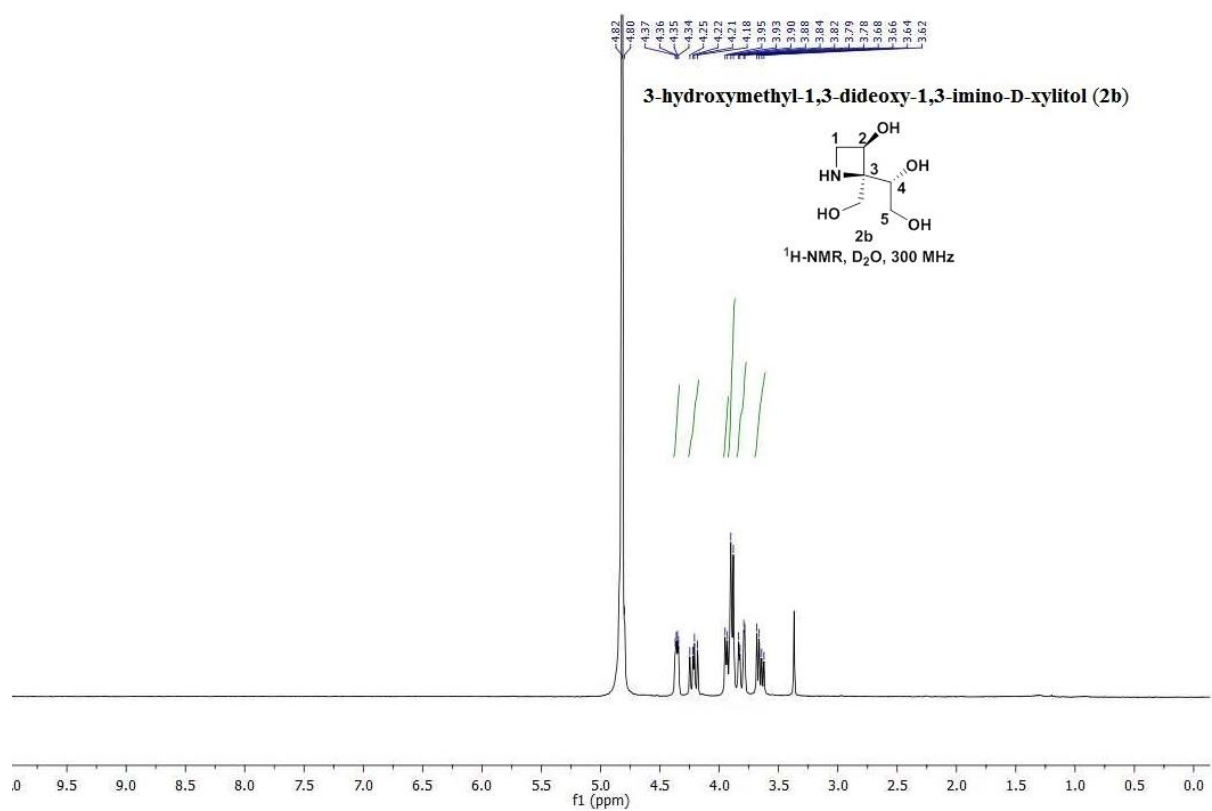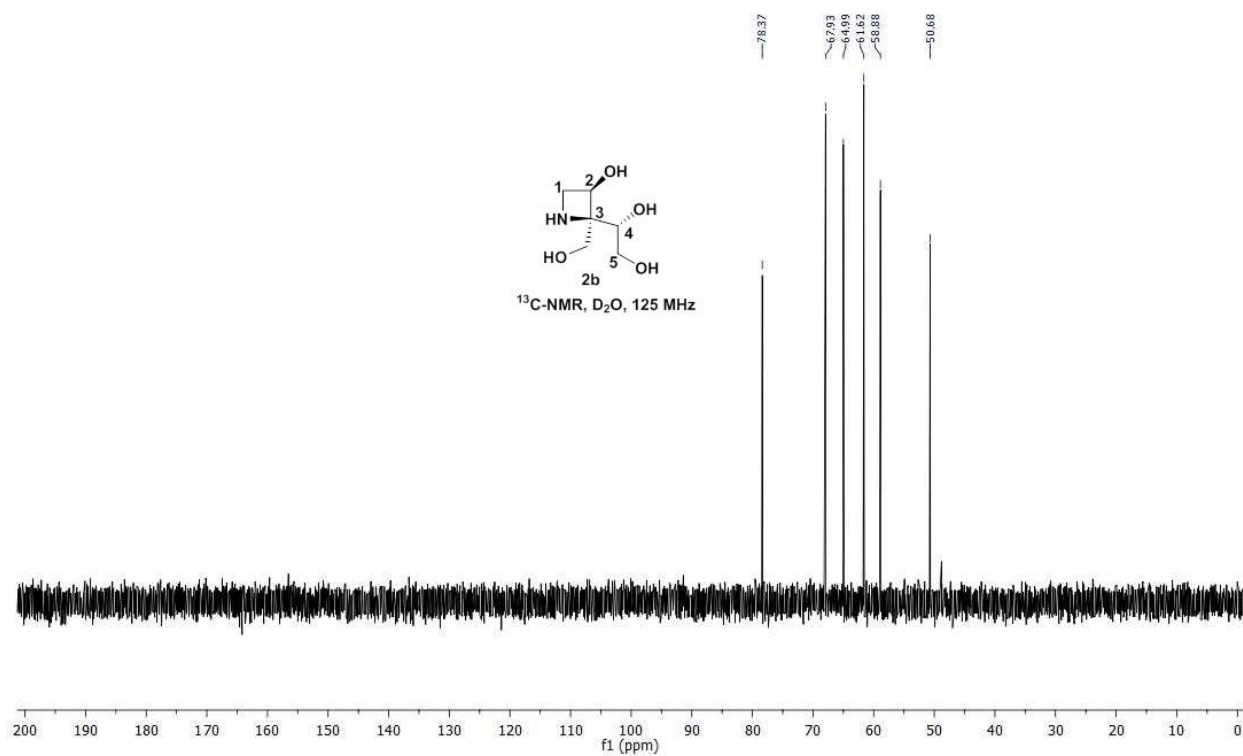

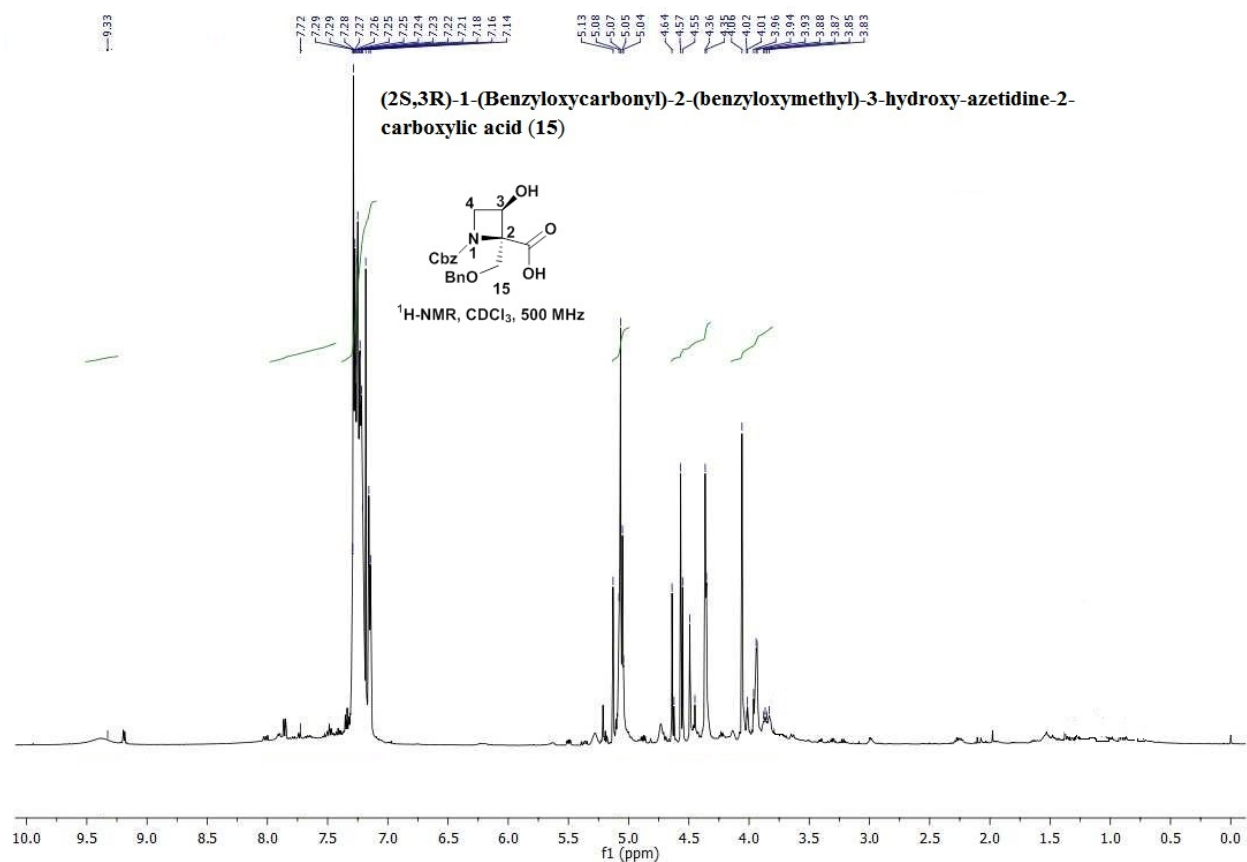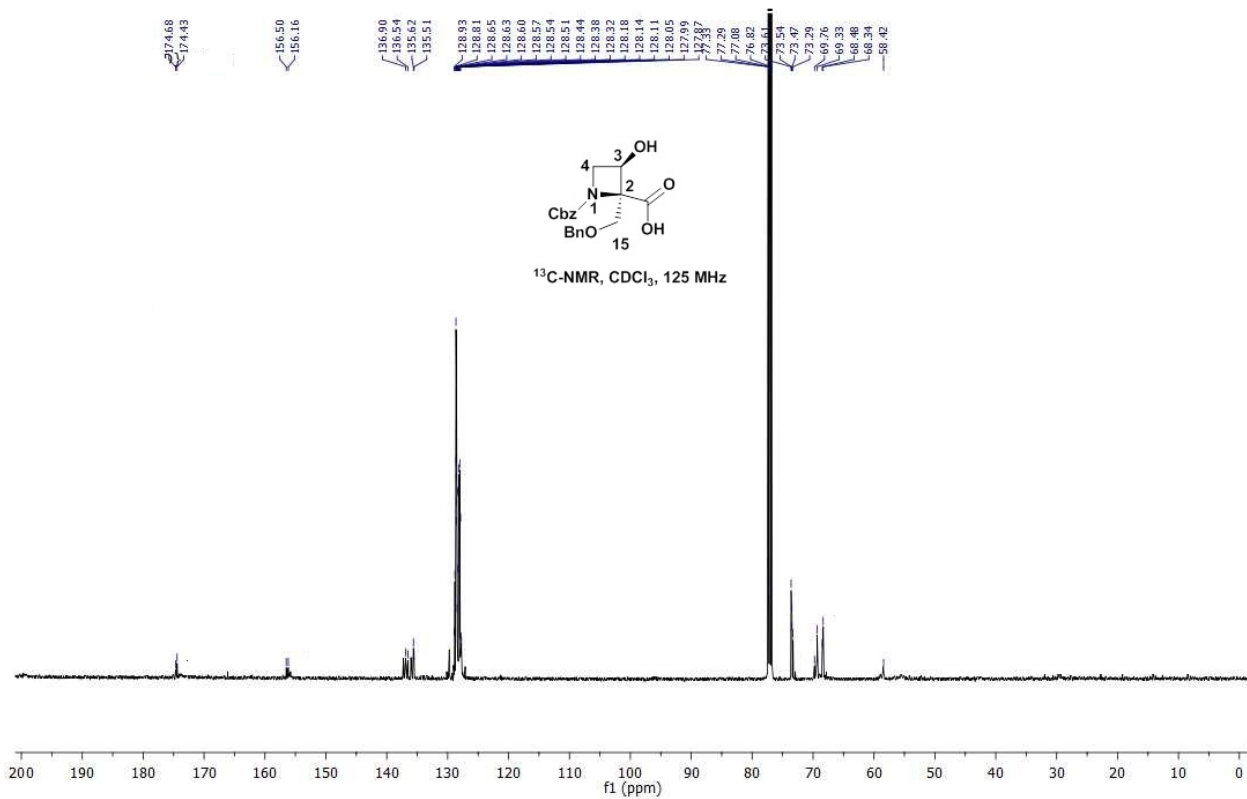

(2S,3R)- 2-(hydroxymethyl)-3-hydroxy-azetidine-2-carboxylic acid (2c)

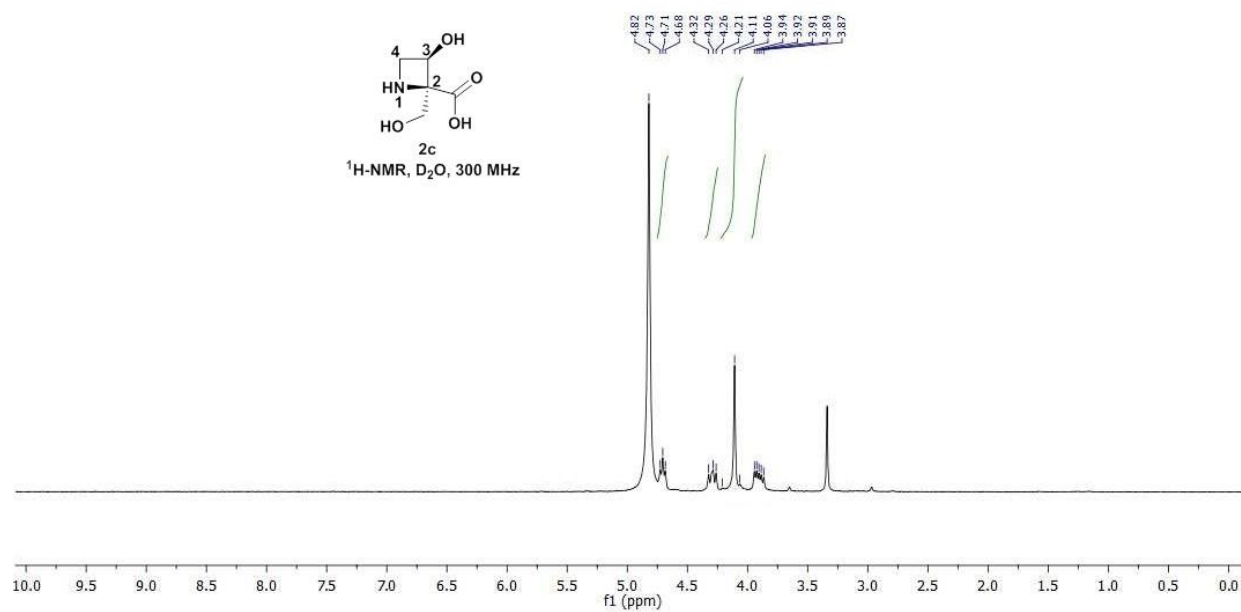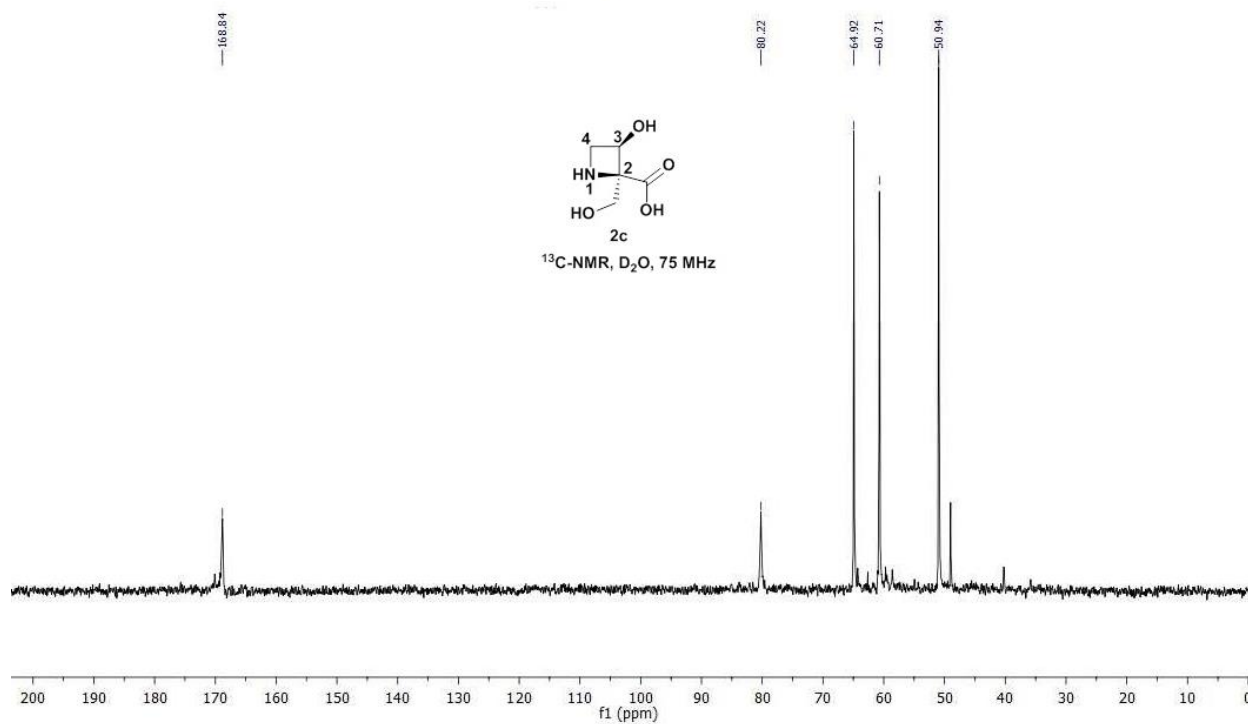



**3,5-dideoxy-3-*C*-(hydroxymethyl)-3,5-imino-1,2-di-*O*-isopropylidene- $\alpha$ -D-xylofuranose (2f)**

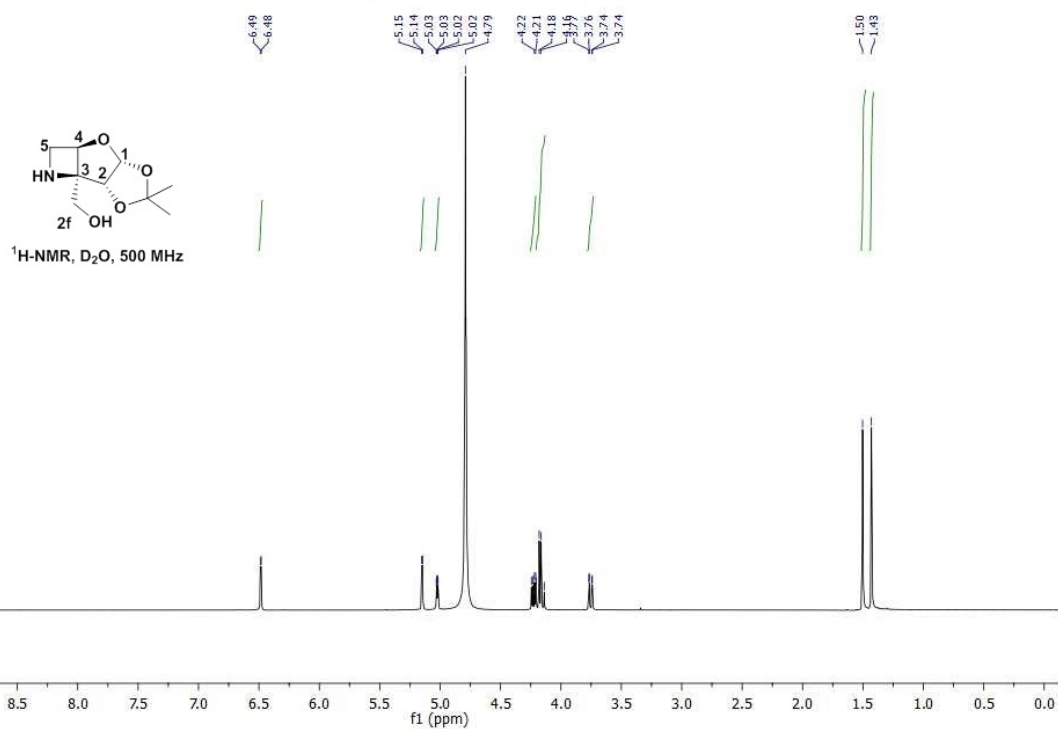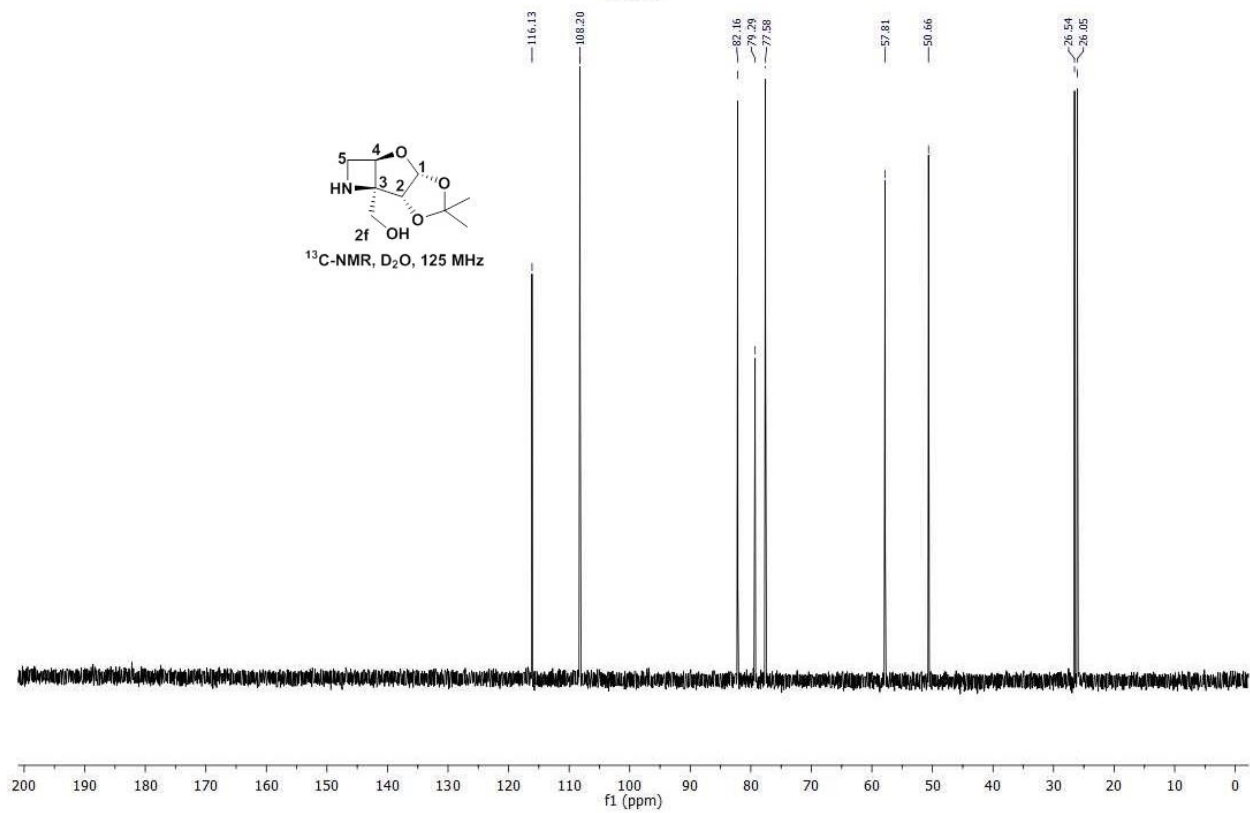

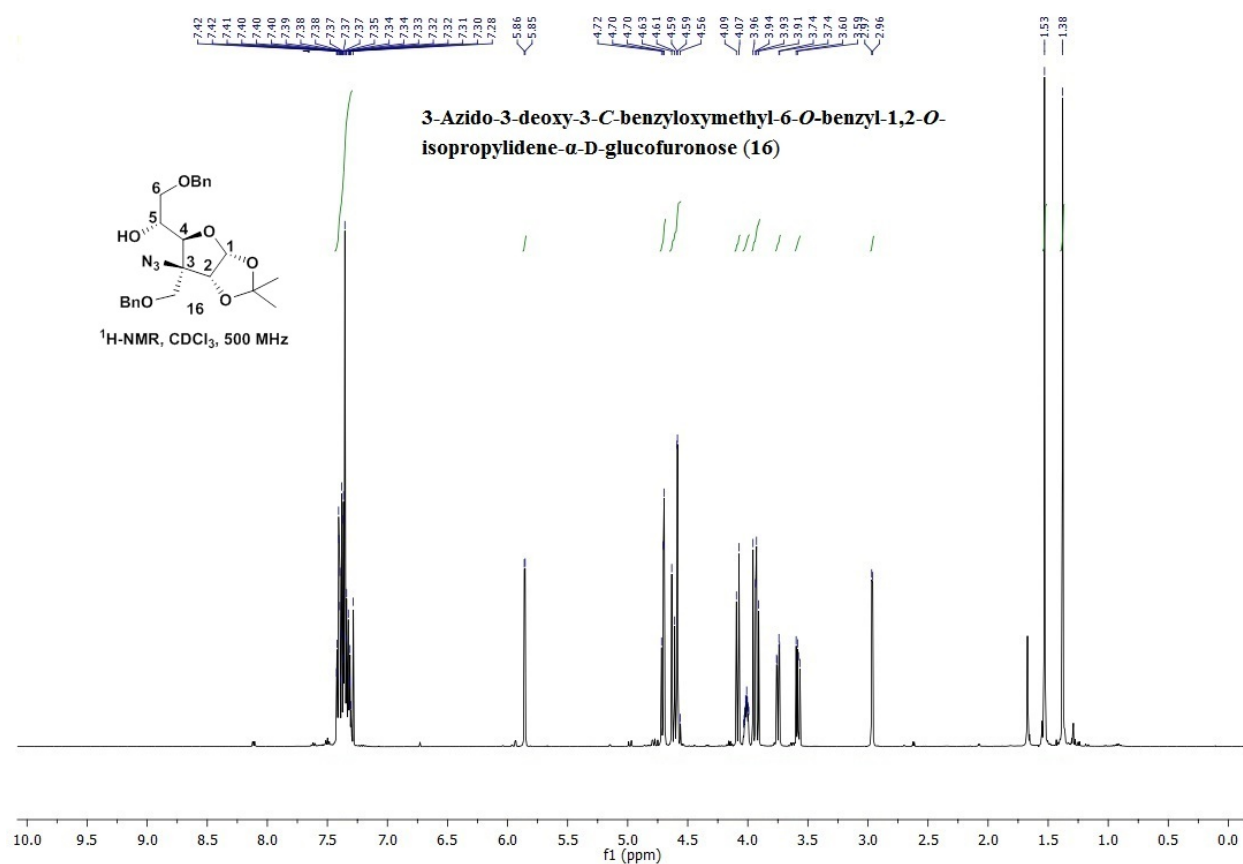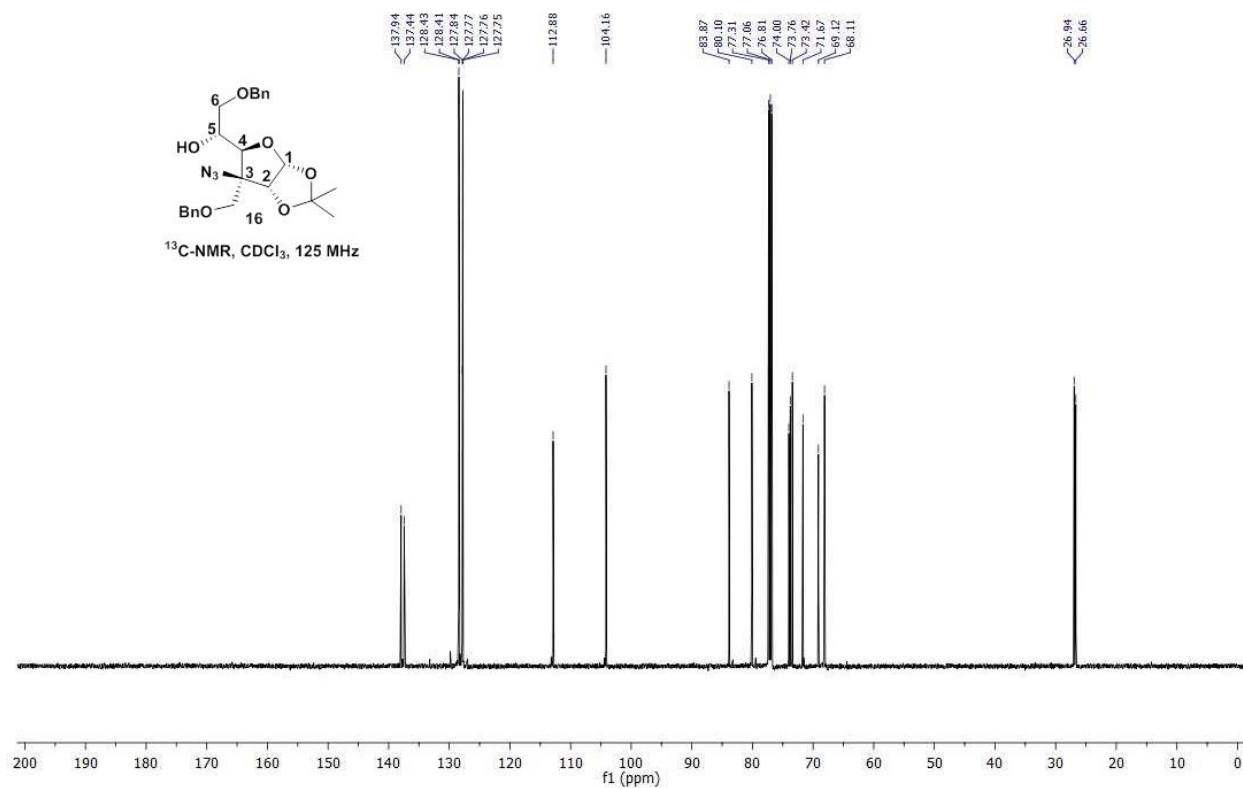

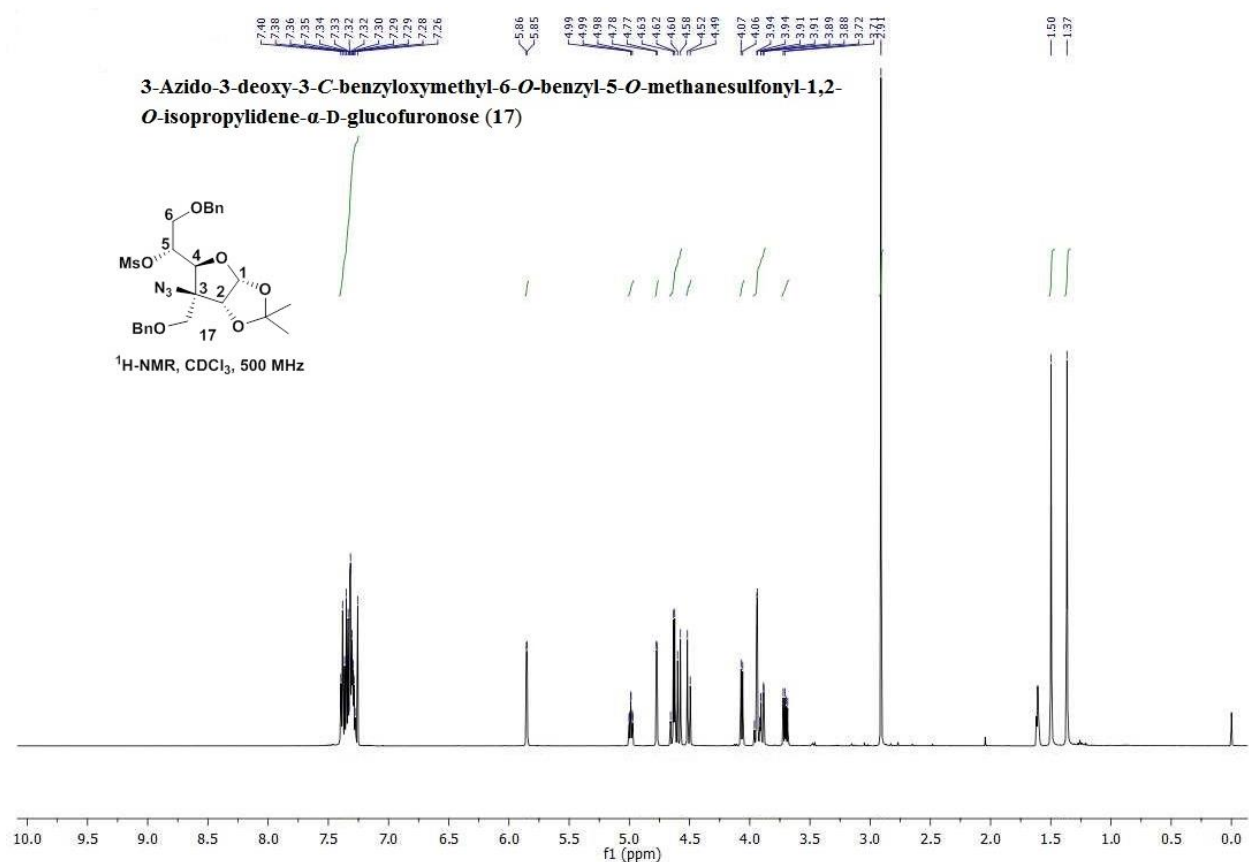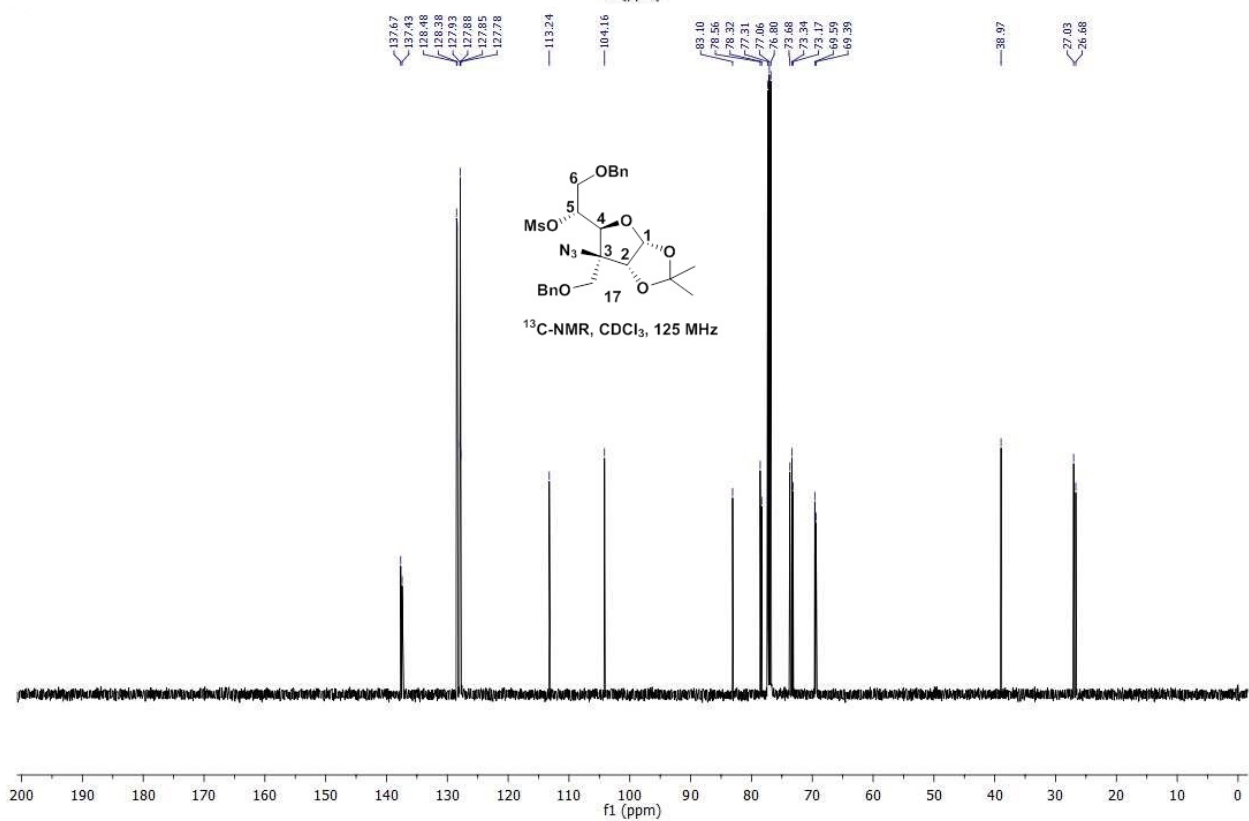

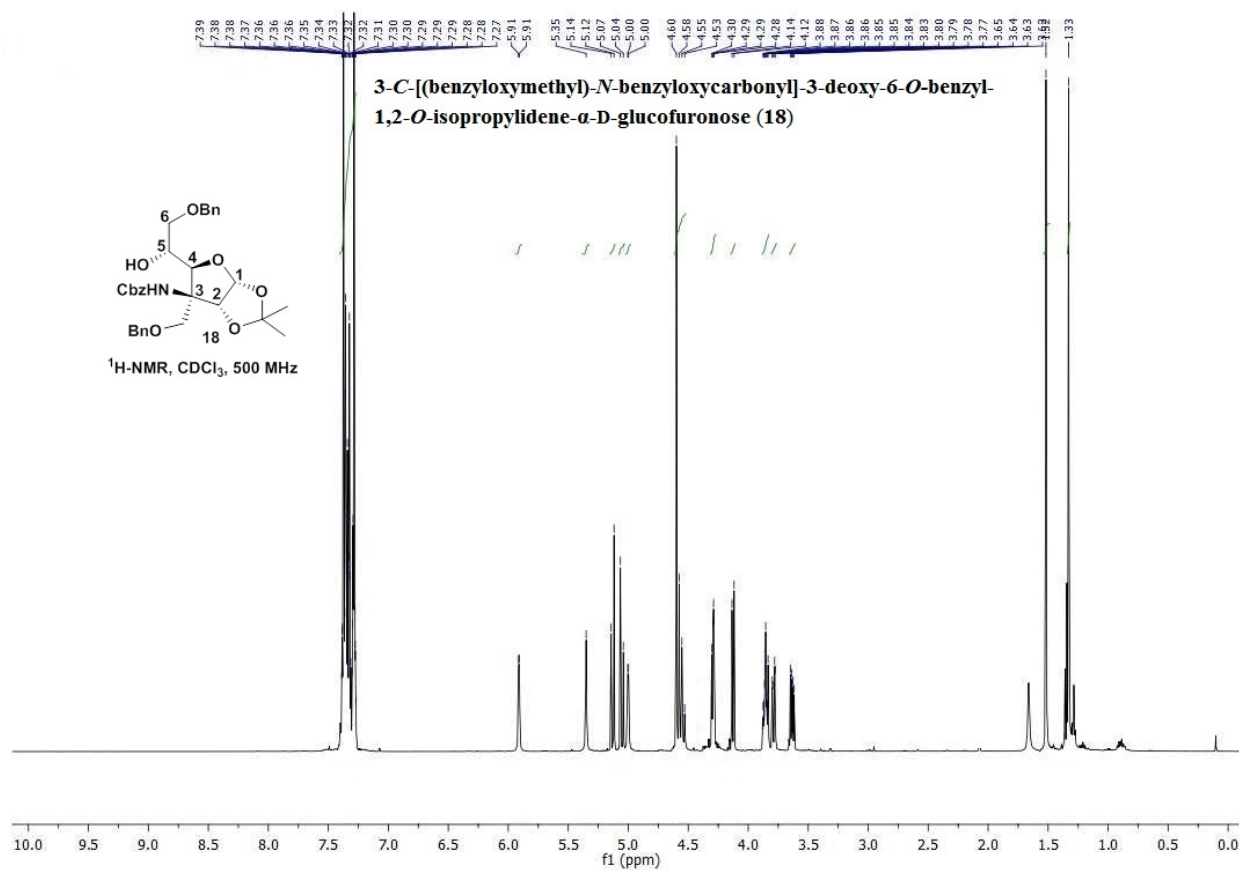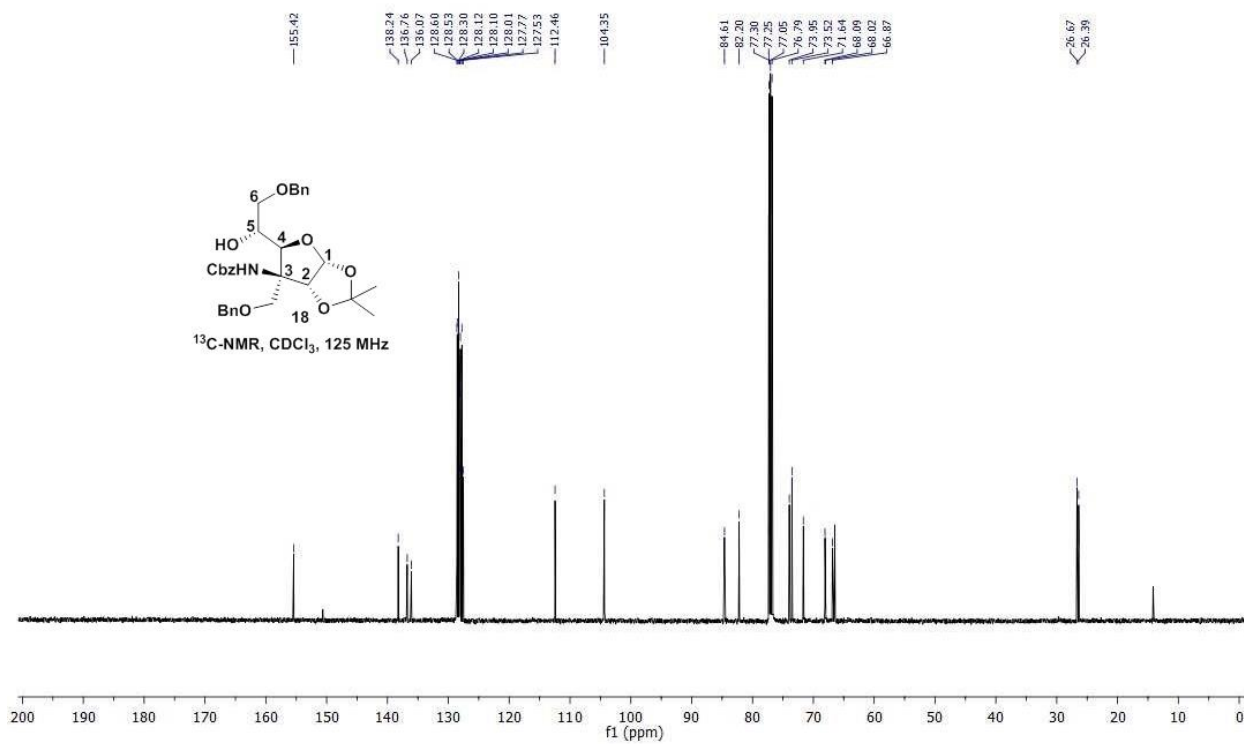

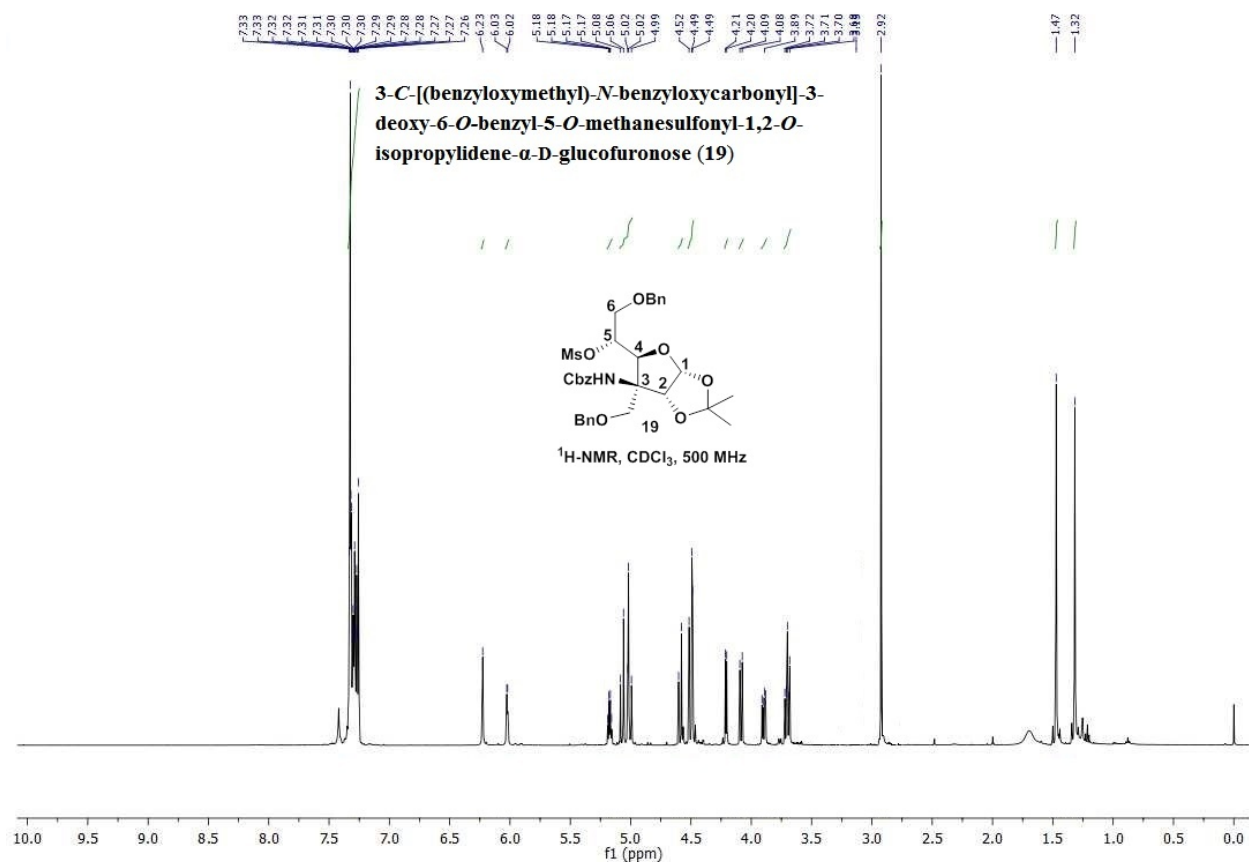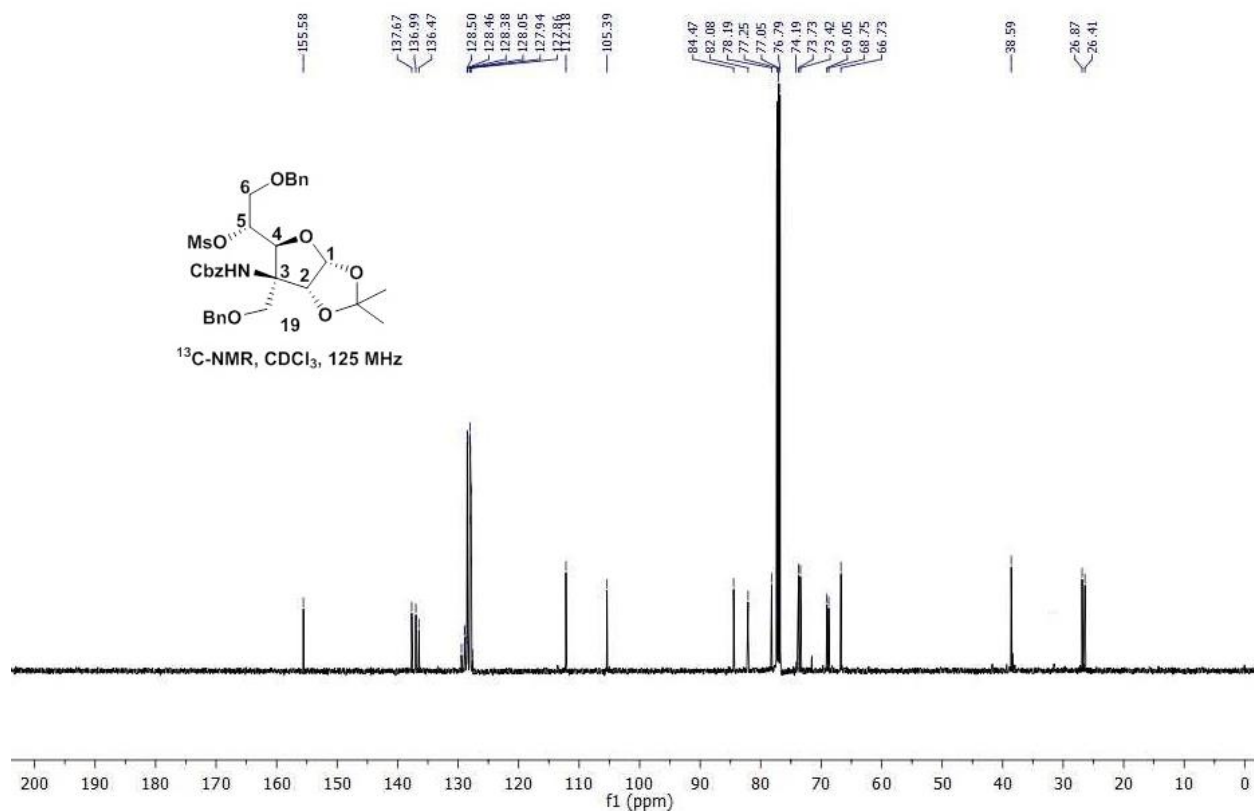

***N*-benzyloxycarbonyl-3-*C*-(benzyloxymethyl)-6-*O*-benzyl-3,5-dideoxy--3,5-imino-1,2-*O*-isopropylidene- $\alpha$ -D-glucufuranose (20)**

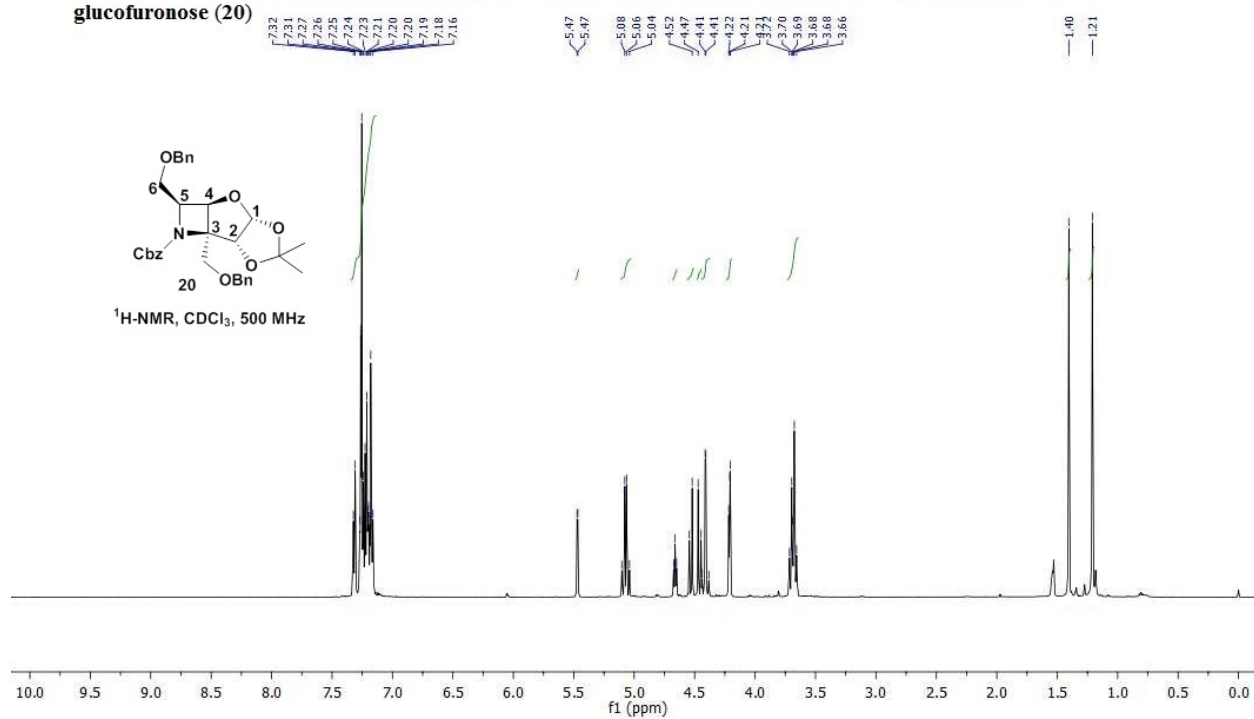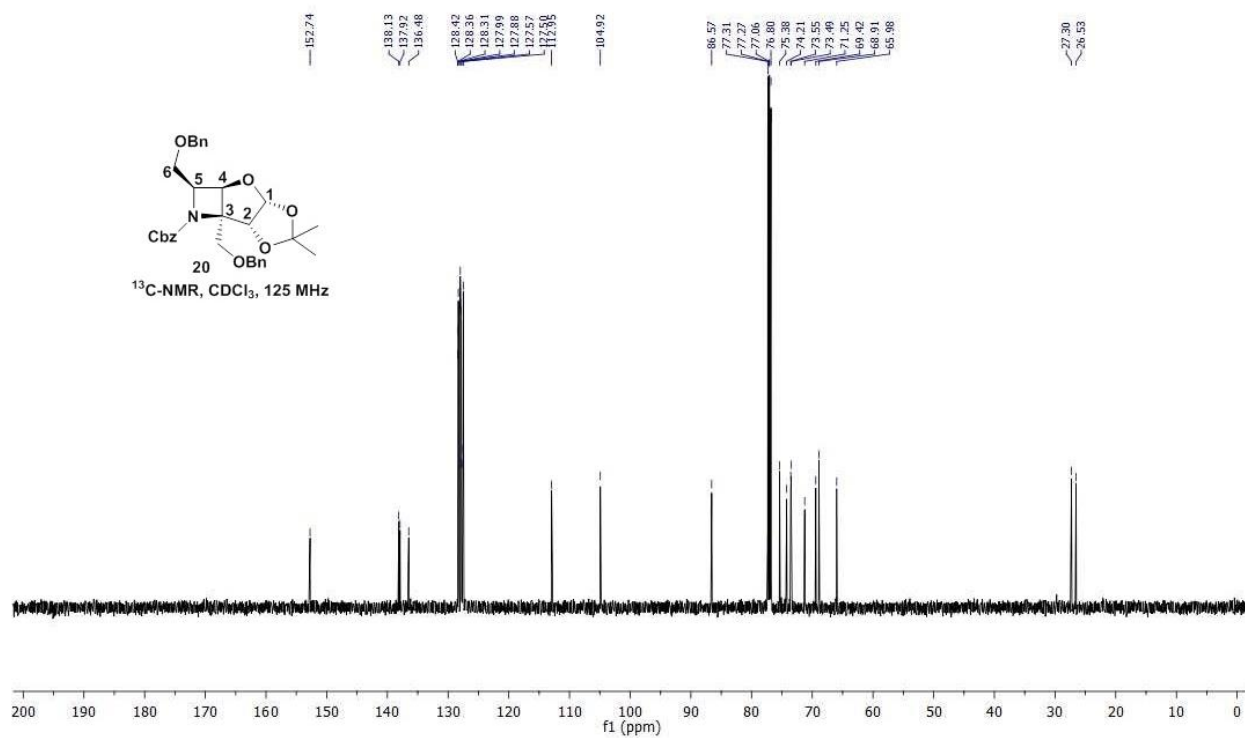

(2*S*,3*R*,4*S*)-2,4-Bis(benzyloxymethyl)-2-hydroxymethyl-3-hydroxy-azetidine-1-carboxylic acid (21a)

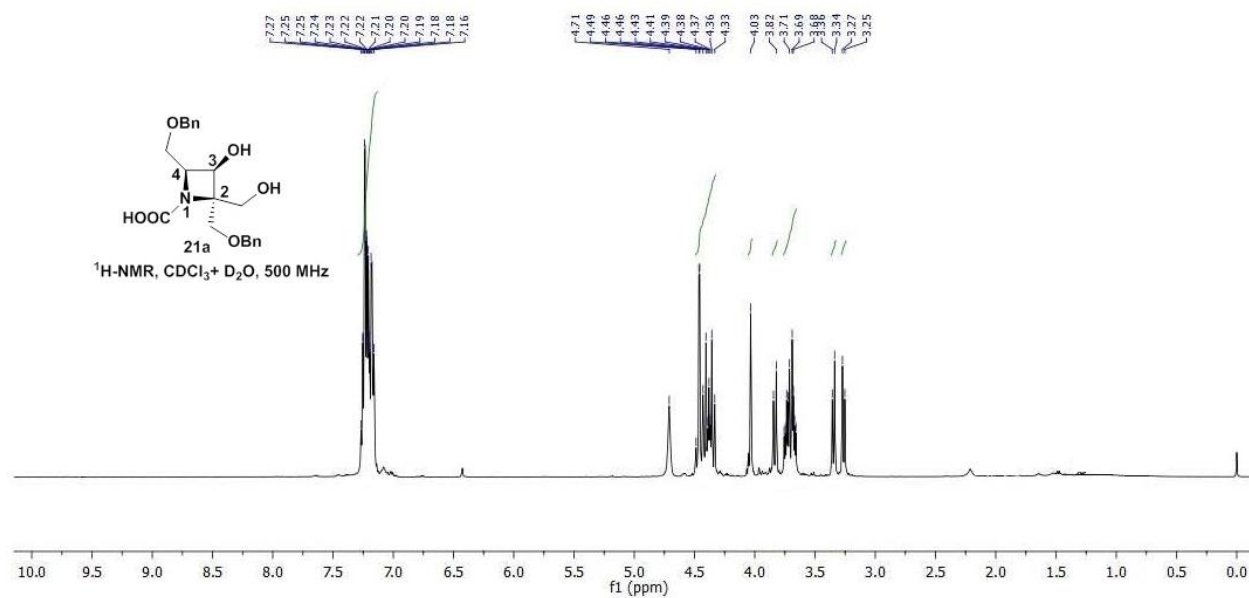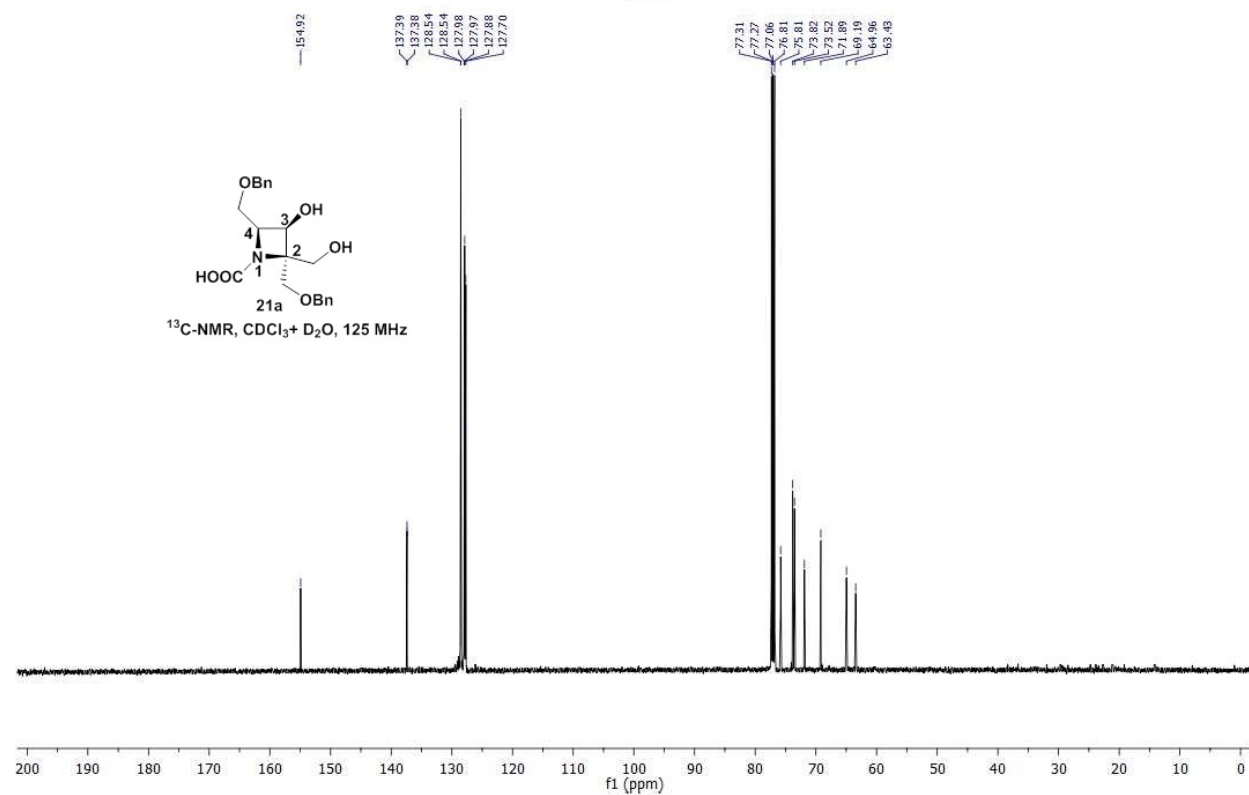

**(3*R*,4*S*)-3-Hydroxy-2,2,4-tris(hydroxymethyl)-azetidine-1-carboxylic acid (2d)**

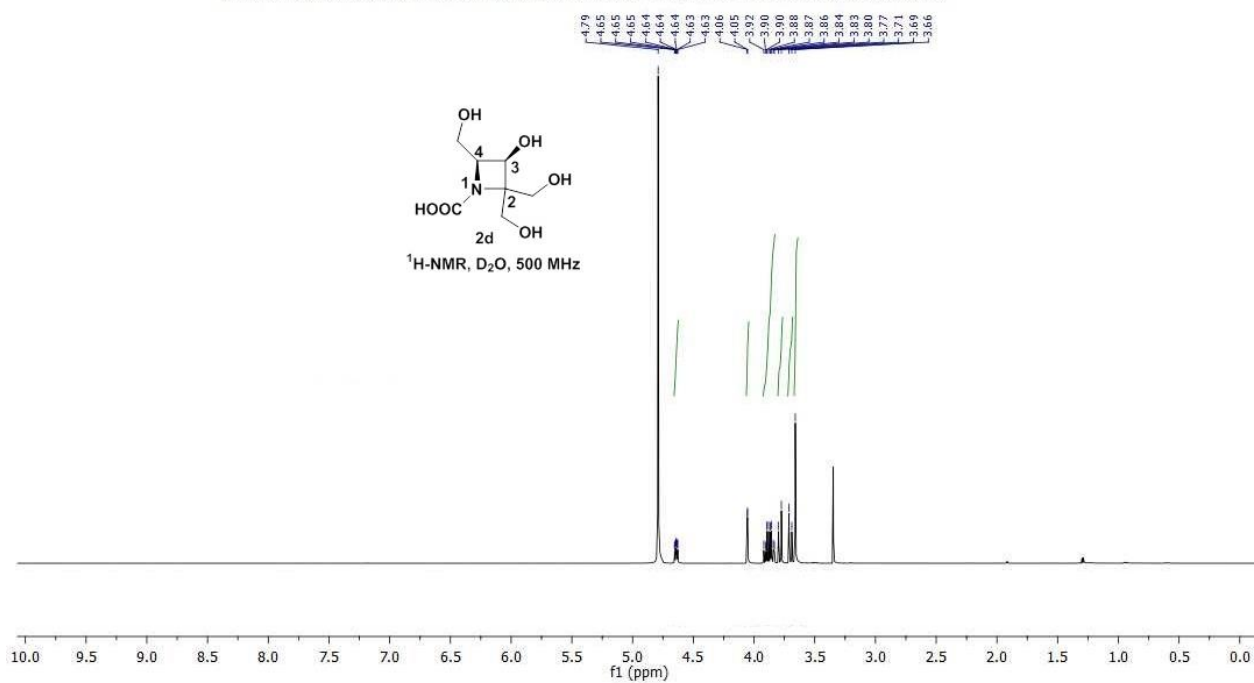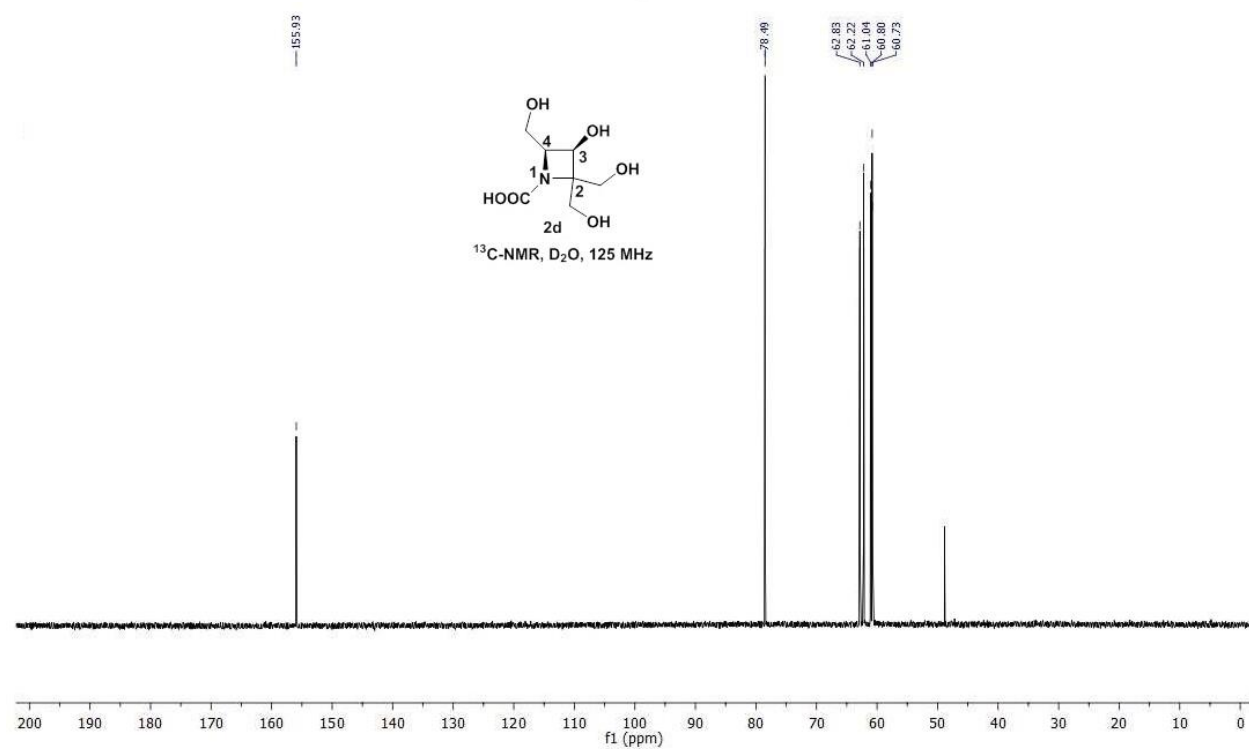



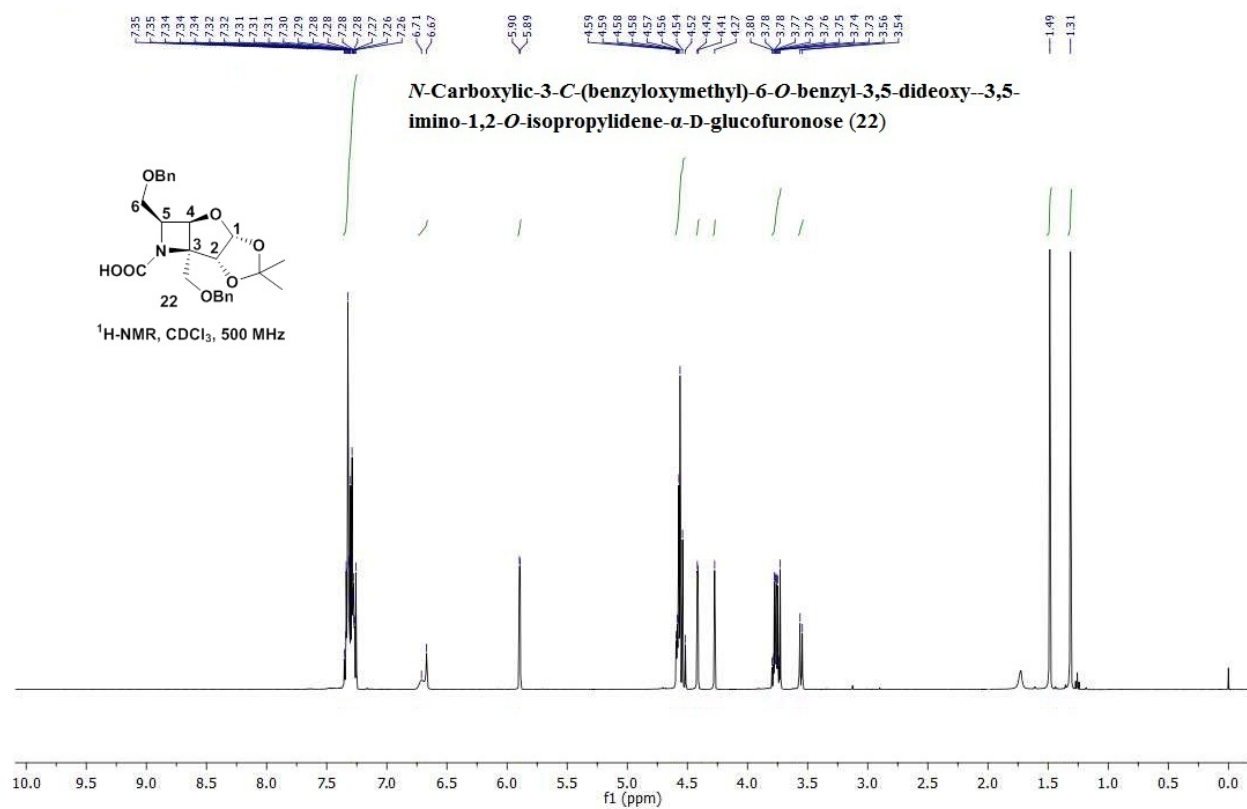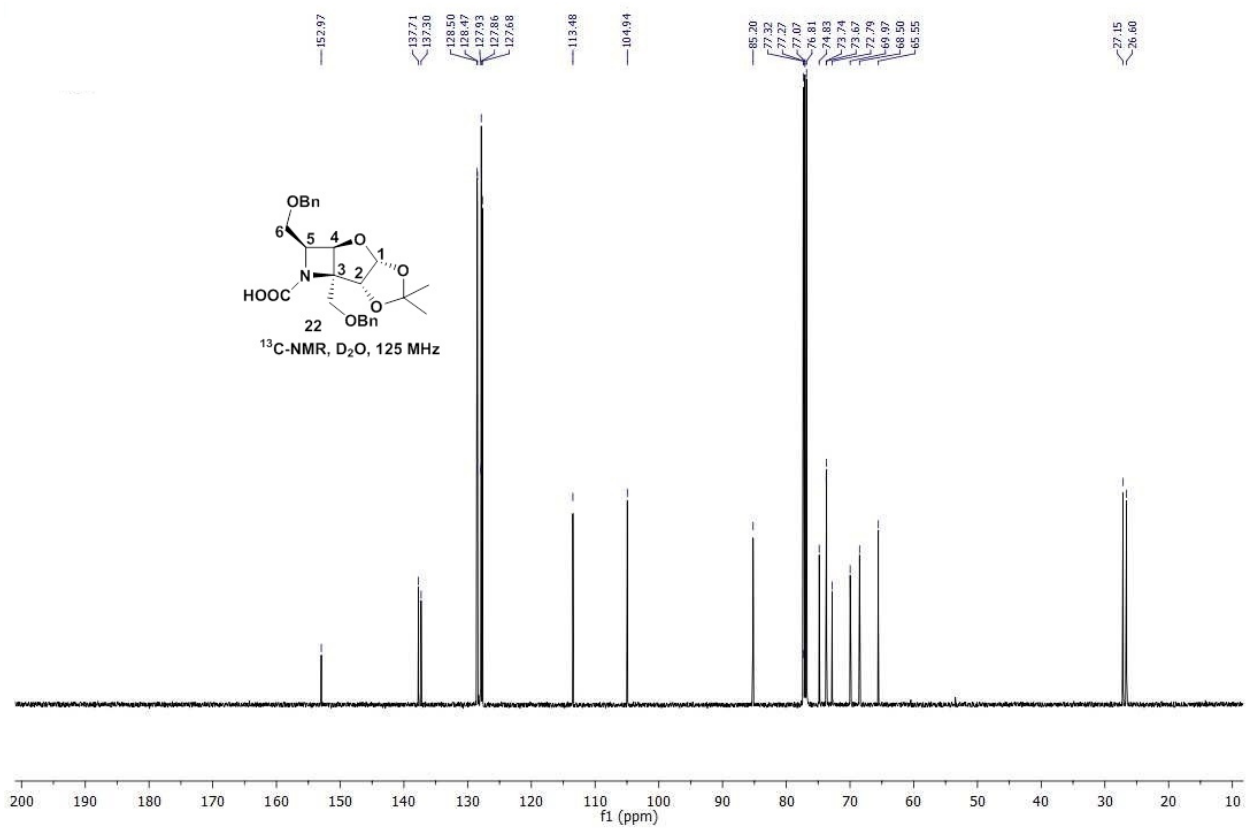

***N*-Carboxylic-3-*C*-(hydroxymethyl)-3,5-dideoxy-3,5-imino-1,2-*O*-isopropylidene- $\alpha$ -D-glucofuranose (2e)**

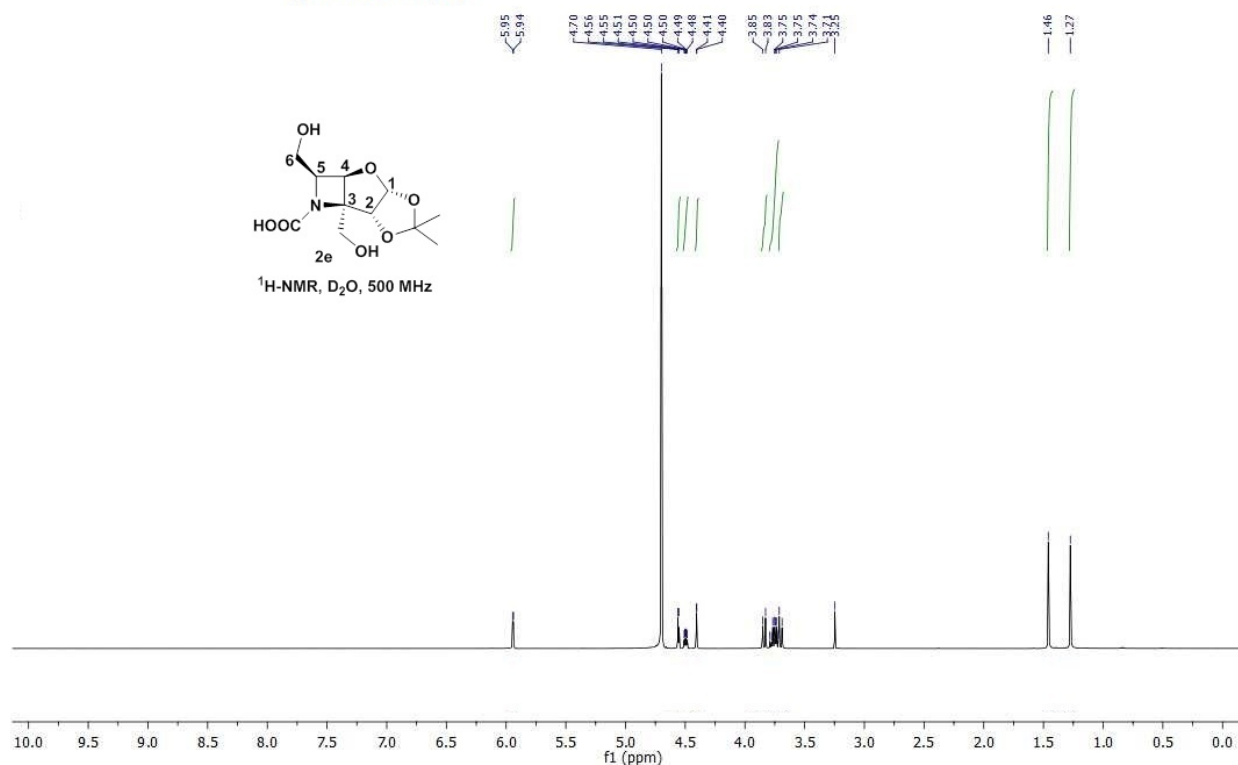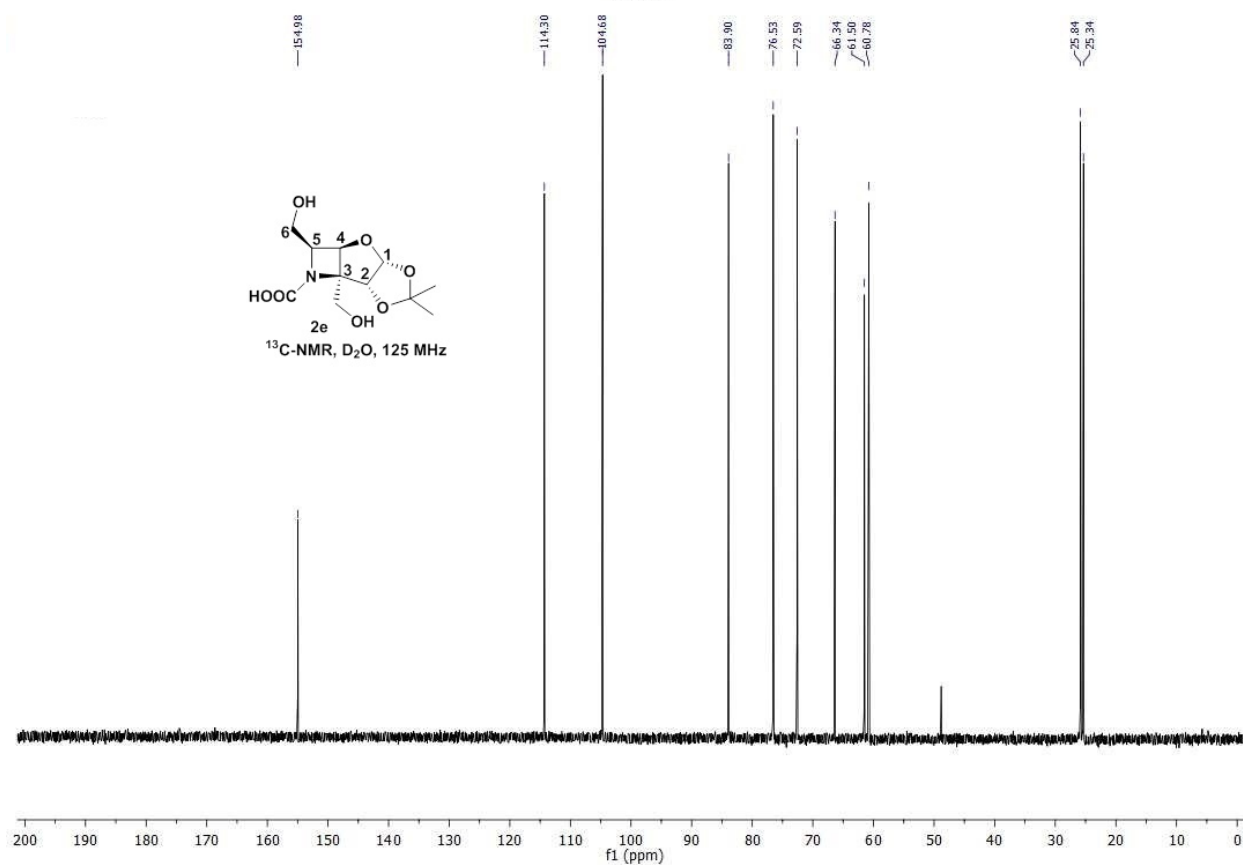

**General Procedure for glycosidase inhibition assay:**

The substrates *p*-nitrophenyl- $\alpha$ -D-glucopyranoside, *p*-nitrophenyl- $\beta$ -D-glucopyranoside, *p*-nitrophenyl- $\alpha$ -D-galactopyranoside, *p*-nitrophenyl- $\beta$ -D-galactopyranoside, *p*-nitrophenyl- $\alpha$ -D-mannopyranoside and *p*-nitrophenyl- $\beta$ -maltoside were procured from sigma chemicals. The inhibition assay with compound was performed by measuring the residual hydrolytic activities of the glycosidases with 2 mM concentration of *p*-nitrophenyl-glycopyranoside prepared in citrate buffer (0.025 M, pH 4.0) and used for assay. The test compound was pre-incubated with the enzyme, buffered at its optimal pH, for 1 h at 37 °C (for  $\alpha$ -galactosidase at 60 °C and for amyloglucosidase 50 °C). The enzyme reaction was initiated by the addition of 100  $\mu$ L of substrate. Reaction was terminated with the addition of 0.05 M Borate buffer (pH 9.8) and absorbance of the liberated *p*-nitrophenol was measured at 420 nm with Molecular Devices Spectramax M5 multmode plate reader. Controls were run simultaneously in the absence of test compound. One unit of glycosidase activity is defined as the amount of enzyme that hydrolyzed 1  $\mu$ mol of *p*-nitrophenol per minute under assay condition.

### Lineweaver Burk Plots:

Lineweaver Burk plot of **2a** with amyloglucosidase from *Aspergillus niger*

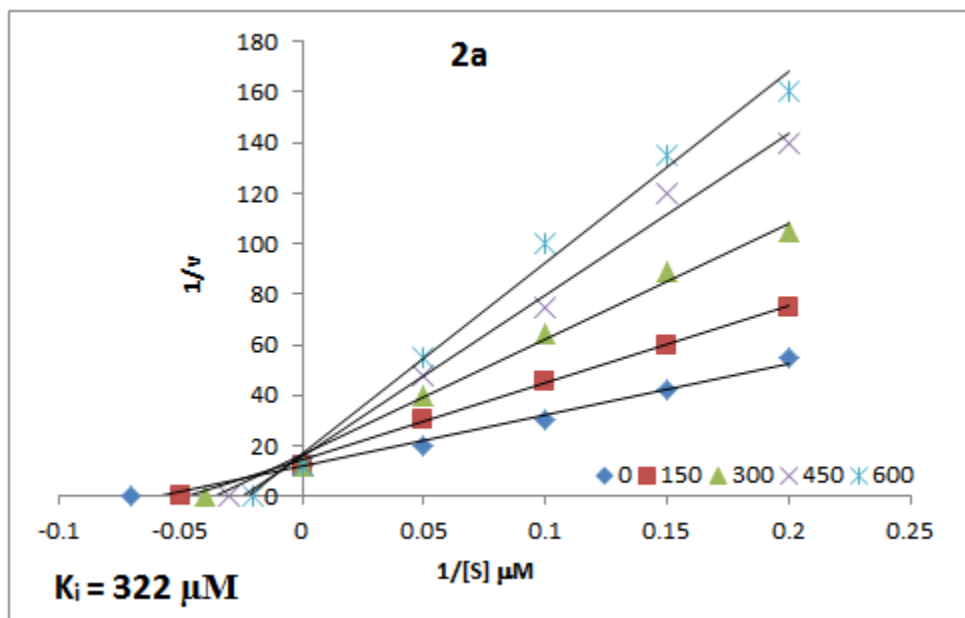

Lineweaver Burk plot of **2b** with amyloglucosidase from *Aspergillus niger*

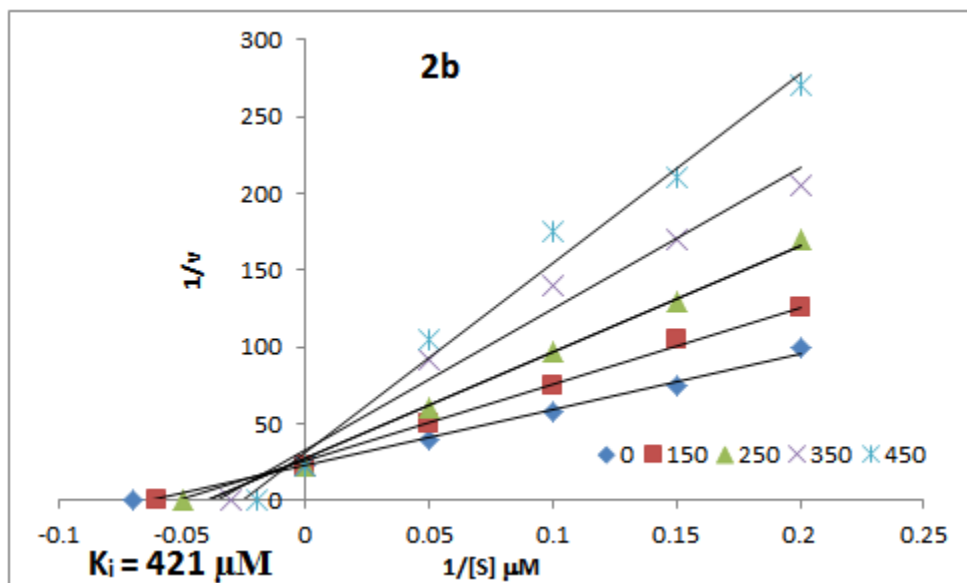

Lineweaver Burk plot of **2c** with amyloglucosidase from *Aspergillus niger*

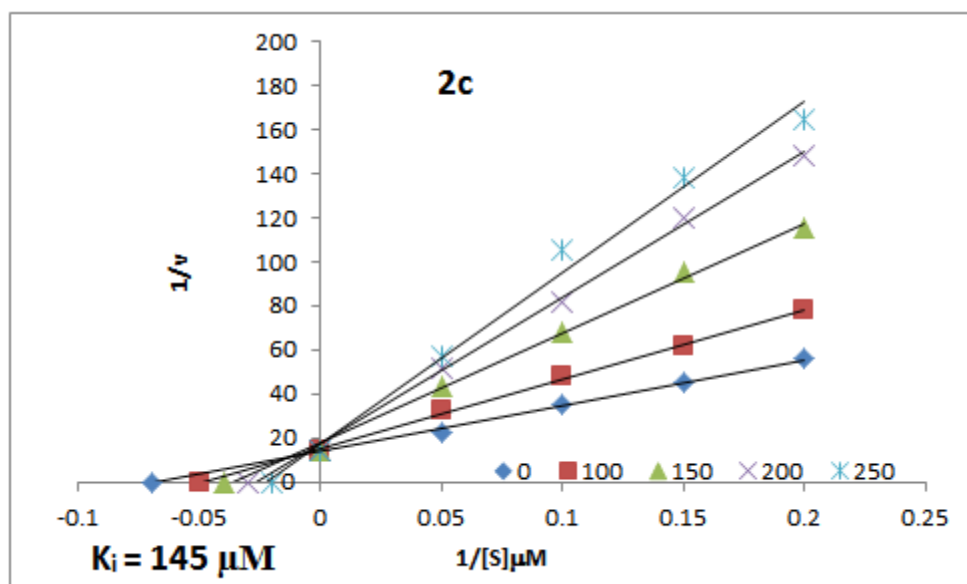

Lineweaver Burk plot of **2d** with amyloglucosidase from *Aspergillus niger*

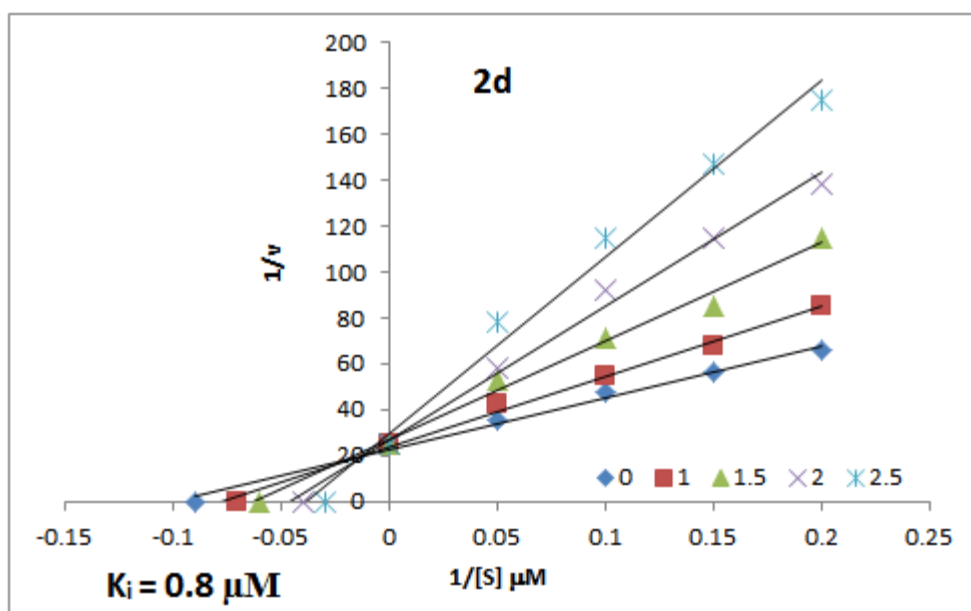

Lineweaver Burk plot of **2e** with amyloglucosidase from *Aspergillus niger*

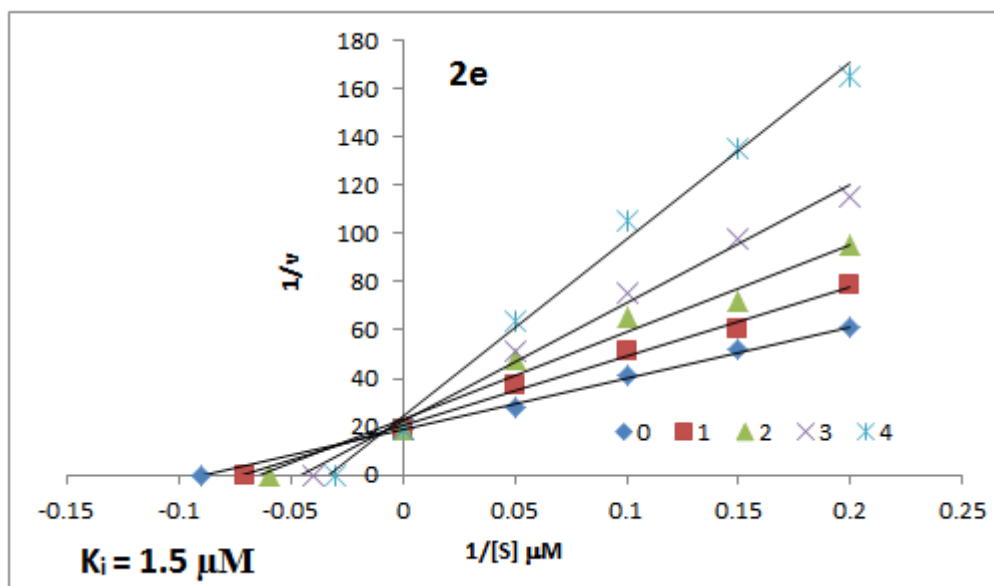

Lineweaver Burk plot of **2f** with amyloglucosidase from *Aspergillus niger*

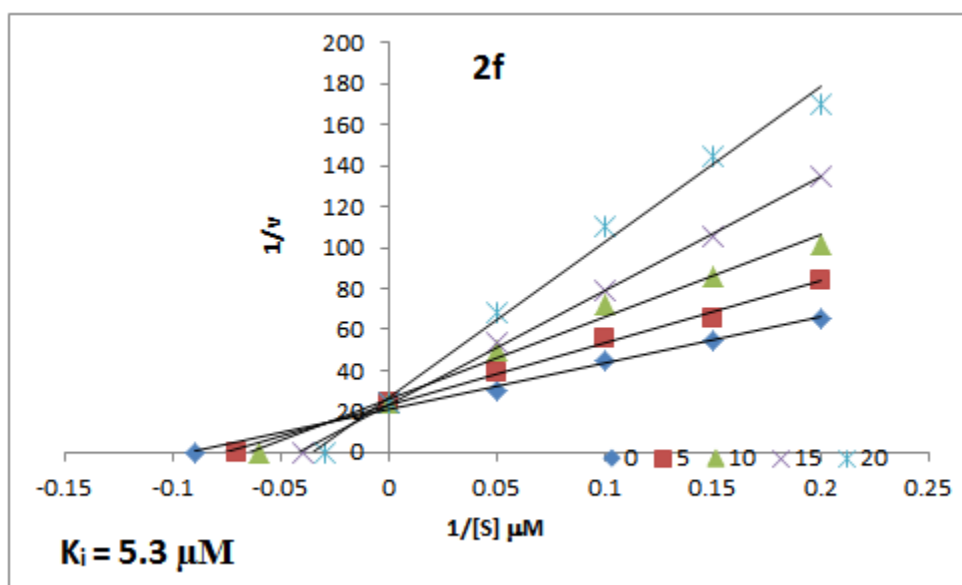

Supplement: c5ob00668f1.pdf [file c5ob00668f1.pdf]
